# Supplementary material for: I2/TBHP-mediated oxidative cascade cyclization of vinyl azide and benzylamine to construct 2,5-disubstituted oxazoles
Source: Royal Society of Chemistry journal article supplement (doi:10.1039/d3ob00771e), 2023-01-01

## Supporting Information

### **I<sub>2</sub>/TBHP mediated oxidative cascade cyclization of vinyl azide and benzylamine to construct 2,5-disubstituted oxazoles**

Mohanreddy Pothireddy,<sup>a</sup> Rana Chatterjee,<sup>a</sup> Penke Vijaya Babu<sup>b</sup> and Rambabu Dandela\*<sup>a</sup>

<sup>a</sup>*Department of Industrial and Engineering Chemistry,*

*Institute of Chemical Technology, Indian Oil Odisha Campus, Samantpuri, Bhubaneswar*

*751013, India*

*E-mail: [r.dandela@iocb.ictmumbai.edu.in](mailto:r.dandela@iocb.ictmumbai.edu.in)*

<sup>b</sup>*Dr. Reddys Institute of Life Sciences, University of Hyderabad Campus, Hyderabad 500046, India*

| <b><u>Table of contents</u></b>                                       | <b><u>Page</u></b> |
|-----------------------------------------------------------------------|--------------------|
| <b>1. Experimental Section.....</b>                                   | <b>S2</b>          |
| <b>2. HRMS data and spectra.....</b>                                  | <b>S3</b>          |
| <b>3. <sup>1</sup>H and <sup>13</sup>C NMR Data.....</b>              | <b>S4</b>          |
| <b>4. References.....</b>                                             | <b>S8</b>          |
| <b>5. Copies of <sup>1</sup>H and <sup>13</sup>C NMR Spectra.....</b> | <b>S10-S47</b>     |

## 1. Experimental Section

### 1.1. General Information

All starting materials and commercial reagents were purchased from Alfa Aesar, Sigma Aldrich, Spectrochem, TCI. Thin Layer Chromatography plates were visualized by exposure to ultraviolet light (UV) with 254 nm of wavelength and then further analyzed by using iodine chamber. Thin-layer chromatography was performed using pre-coated plates. Column chromatography was performed in 120 to 200 mesh size silica gel. The reactions were carried out in a round bottom flask and sealed tube. All NMR spectra of the synthesized products were recorded by Bruker Advanced 400 spectrometer ( $^1\text{H}$  NMR at 400 MHz and  $^{13}\text{C}$  NMR at 100 MHz). Chemical shifts for  $^1\text{H}$  NMR spectra have been reported in parts per million (ppm) from tetramethyl silane with the solvent resonance as the internal standard ( $\text{CDCl}_3$ :  $\delta$  7.26 ppm). Similarly,  $^{13}\text{C}$  NMR spectra have been reported in parts per million (ppm) from tetramethyl silane with the solvent as the internal standard ( $\text{CDCl}_3$ :  $\delta$  77.00 ppm). The  $^1\text{H}$  NMR and  $^{13}\text{C}$  NMR of the known products were compared with literature reports.

**1.2. General procedure for the synthesis of 2,5-disubstituted oxazoles (3):** In a sealed tube, a mixture of vinyl azide (**1**, 1.0 mmol), and benzylamine (**2**, 3.0 mmol),  $\text{I}_2$  (1.0 equiv.) and TBHP (3.0 equiv.) was taken in DMSO (2.0 mL). After that, the reaction mixture was stirred at 80 °C for 2 h under open air. After completion of the reaction monitoring by TLC, the resulting solution was then cooled to room temperature and the mixture was diluted with ethyl acetate (15 mL) and washed with water (10 mL). Then the crude was extracted with ethyl acetate (3×5 mL), and dried over anhydrous  $\text{Na}_2\text{SO}_4$  and concentrated in vacuo. Later, the crude product was collected and purified by column chromatography on silica gel (100-200 mesh) using petroleum ether/ethyl acetate (20:1) to get the desired product **3**.

## 2. HRMS data and spectra:

TB

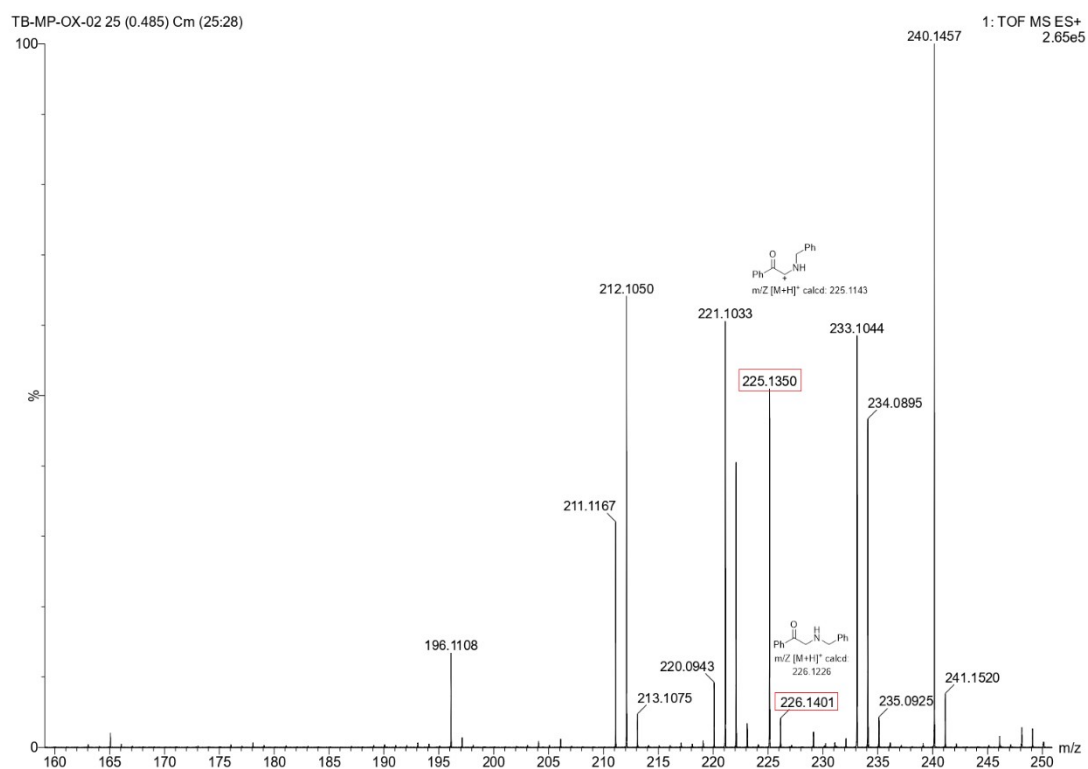

TB

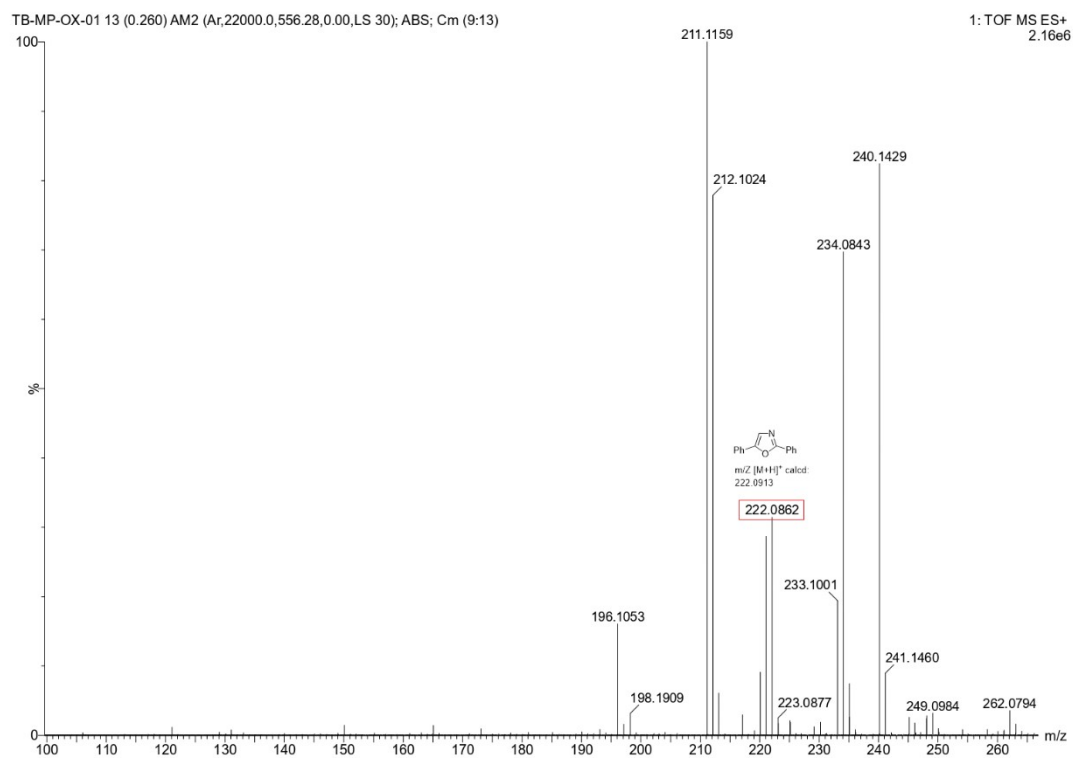

### 3. <sup>1</sup>H and <sup>13</sup>C data of the compounds:

#### 2,5-diphenyloxazole (3a)<sup>1</sup>

Yield: 82%; white solid; m.p. 64 - 68 °C; <sup>1</sup>H NMR (400 MHz, CDCl<sub>3</sub>) δ 8.13 (dd, *J* = 7.8, 1.8 Hz, 2H), 7.78 – 7.70 (m, 2H), 7.47 (dd, *J* = 12.6, 4.8 Hz, 6H), 7.36 (t, *J* = 7.4 Hz, 1H). <sup>13</sup>C NMR (101 MHz, CDCl<sub>3</sub>) δ 163.80, 151.79, 130.26, 129.14, 128.83, 127.91, 126.26, 125.89, 125.44, 124.08, 122.85.

#### 2-(4-fluorophenyl)-5-phenyloxazole (3b)<sup>1</sup>

Yield: 78%; white solid; m.p. 87 - 91 °C; <sup>1</sup>H NMR (400 MHz, CDCl<sub>3</sub>) δ 8.03 (dd, *J* = 7.8, 5.7 Hz, 2H), 7.64 (d, *J* = 7.9 Hz, 2H), 7.40 – 7.35 (m, 3H), 7.28 (d, *J* = 7.2 Hz, 1H), 7.10 (t, *J* = 8.4 Hz, 2H); <sup>13</sup>C NMR (101 MHz, CDCl<sub>3</sub>) δ 163.0 (d, *J* = 251.1 Hz), 159.3, 150.3, 127.9(2C), 127.4 (d, *J* = 7.5 Hz) 127.3, 126.9, 124.4, 123.2 (2C), 122.8 (d, *J* = 3.3 Hz), 122.4, 115.1, 114.9. HRMS (ESI): *m/z* for C<sub>15</sub>H<sub>11</sub>FNO (M + H)<sup>+</sup>: calcd: 240.0819, found: 240.0834.

#### 2-(2-fluorophenyl)-5-phenyloxazole (3c)<sup>1</sup>

Yield: 71%; white solid; m.p. 99 - 103 °C; <sup>1</sup>H NMR (400 MHz, CDCl<sub>3</sub>) δ 8.11 (t, *J* = 7.6 Hz, 1H), 7.74 (d, *J* = 7.8 Hz, 2H), 7.51 (s, 1H), 7.45 (t, *J* = 7.4 Hz, 3H), 7.35 (t, *J* = 7.4 Hz, 1H), 7.26 (d, *J* = 6.7 Hz, 1H), 7.22 (d, *J* = 8.8 Hz, 1H). <sup>13</sup>C NMR (101 MHz, CDCl<sub>3</sub>) δ 160.06 (d, *J* = 257.3 Hz), 157.55, 151.56, 131.88 (d, *J* = 8.4 Hz), 129.36 (d, *J* = 1.7 Hz), 128.97 (2C), 128.63, 127.83, 124.40, 124.36 (2C), 123.41, 116.94 (d, *J* = 21.4 Hz), 115.75 (d, *J* = 10.9 Hz).

#### 2-(4-chlorophenyl)-5-phenyloxazole (3d)<sup>1</sup>

Yield: 75%; white solid; m.p. 96 - 99 °C; <sup>1</sup>H NMR (400 MHz, CDCl<sub>3</sub>) δ 7.97 (d, *J* = 8.1 Hz, 2H), 7.65 (d, *J* = 7.6 Hz, 2H), 7.39 (d, *J* = 8.7 Hz, 5H), 7.29 (d, *J* = 7.3 Hz, 1H). <sup>13</sup>C NMR (101 MHz, CDCl<sub>3</sub>) δ 159.2, 150.5, 135.4, 128.1, 128.9, 127.6, 126.8, 126.5, 124.9, 123.2, 122.5. HRMS (ESI): *m/z* for C<sub>15</sub>H<sub>11</sub>ClNO (M + H)<sup>+</sup>: calcd: 256.0524, found: 308.0542.

#### 5-phenyl-2-(4-(trifluoromethyl)phenyl)oxazole (3e)<sup>1</sup>

Yield: 56%; white solid; m.p. 107 - 110 °C; <sup>1</sup>H NMR (400 MHz, CDCl<sub>3</sub>) δ 8.23 (d, *J* = 8.1 Hz, 2H), 7.75 (d, *J* = 8.1 Hz, 4H), 7.51 – 7.43 (m, 3H), 7.38 (t, *J* = 7.4 Hz, 1H); <sup>13</sup>C NMR (101 MHz, CDCl<sub>3</sub>) δ 153.1, 152.1, 132.0, 130.5 (d, *J* = 3.3 Hz), 129.0 (2C), 128.9, 127.6, 126.5 (2C), 125.9 (d, *J* = 3.9 Hz), 124.4 (2C), 123.8, 123.7 (dd, *J* = 278.3, 131.9 Hz), 106.2 (d, *J* = 2.1 Hz).

**2-(3-fluoro-5-(trifluoromethyl)phenyl)-5-phenyloxazole (3f)**

Yield: 53%; white gummy; <sup>1</sup>H NMR (400 MHz, CDCl<sub>3</sub>) δ 8.17 (s, 1H) 7.98 (d, *J* = 8.4 Hz, 1H), 7.74 (d, *J* = 7.7 Hz, 2H), 7.52 – 7.44 (m, 3H), 7.40 (dd, *J* = 13.9, 7.0 Hz, 2H); <sup>13</sup>C NMR (101 MHz, CDCl<sub>3</sub>) δ 162.7 (d, *J* = 249.4 Hz), 158.6 (d, *J* = 3.5 Hz), 152.4, 130.4 (d, *J* = 8.7 Hz), 129.1 (2C), 128.9, 128.5, 127.4, 124.5 (2C), 123.8, 123.3 (dd, *J* = 270.0, 75.0 Hz), 118.9 (t, *J* = 3.7 Hz), 116.4 (d, *J* = 24.1 Hz), 114.3 (dq, *J* = 11.2, 3.9 Hz); HRMS (ESI): *m/z* for C<sub>16</sub>H<sub>10</sub>F<sub>4</sub>NO (M + H)<sup>+</sup>: calcd: 308.0693, found: 308.0690.

**5-(4-fluorophenyl)-2-phenyloxazole (3g)<sup>1</sup>**

Yield: 72%; white solid; m.p. 89 - 93 °C; <sup>1</sup>H NMR (400 MHz, CDCl<sub>3</sub>) δ 8.10 (d, *J* = 6.6 Hz, 2H), 7.72 – 7.67 (m, 2H), 7.48 (d, *J* = 5.6 Hz, 3H), 7.38 (s, 1H), 7.14 (t, *J* = 8.1 Hz, 2H); <sup>13</sup>C NMR (101 MHz, CDCl<sub>3</sub>) δ 162.7 (d, *J* = 248.9 Hz), 161.2, 150.5, 134.8, 131.6 (d, *J* = 9.5 Hz), 130.4, 128.8 (2C), 127.3, 126.3 (2C), 126.1 (d, *J* = 8.2 Hz), 124.4 (d, *J* = 3.4 Hz), 123.1, 116.1 (d, *J* = 22.1 Hz).

**5-(4-chlorophenyl)-2-phenyloxazole (3h)<sup>1</sup>**

Yield: 77%; white solid; m.p. 98 - 101 °C; <sup>1</sup>H NMR (400 MHz, CDCl<sub>3</sub>) δ 8.14 – 8.08 (m, 2H), 7.66 (d, *J* = 8.4 Hz, 2H), 7.49 (d, *J* = 5.5 Hz, 3H), 7.44 (d, *J* = 2.7 Hz, 2H), 7.41 (s, 1H); <sup>13</sup>C NMR (101 MHz, CDCl<sub>3</sub>) δ 161.4, 150.3, 134.2, 130.5, 129.2 (2C), 128.9 (2C), 127.3, 126.5, 126.3 (2C), 125.4 (2C), 123.8.

**5-(4-chlorophenyl)-2-(4-fluorophenyl)oxazole (3i)<sup>1</sup>**

Yield: 65%; yellow solid; m.p. 84 - 88 °C; <sup>1</sup>H NMR (400 MHz, CDCl<sub>3</sub>) δ 8.10 – 7.94 (m, 2H), 7.58 (d, *J* = 8.0 Hz, 2H), 7.37 (t, *J* = 9.2 Hz, 3H), 7.11 (t, *J* = 8.3 Hz, 2H). <sup>13</sup>C NMR (101 MHz, CDCl<sub>3</sub>) δ 160.7, 150.4, 134.0, 129.3, 128.5 (d, *J* = 8.6 Hz), 126.4, 125.4, 123.83, 116.2, 115.99.

**5-(4-chlorophenyl)-2-(4-(trifluoromethyl)phenyl)oxazole (3j)**

Yield: 54%; yellow solid; m.p. 91 - 95 °C; <sup>1</sup>H NMR (400 MHz, CDCl<sub>3</sub>) δ 8.22 (d, *J* = 7.8 Hz, 2H), 7.75 (d, *J* = 7.8 Hz, 2H), 7.67 (d, *J* = 8.5 Hz, 2H), 7.51 – 7.40 (m, 3H). <sup>13</sup>C NMR (101 MHz, CDCl<sub>3</sub>) δ 151.13, 144.58, 134.70, 130.37, 129.35, 126.54 (2C), 126.12, 125.92 (dd, *J* = 7.8, 4.0 Hz), 125.61 (2C), 125.19 (d, *J* = 2.0 Hz), 124.16, 123.20 (dd, *J* = 279.5, 130.7 Hz), 122.47; HRMS (ESI): *m/z* for C<sub>16</sub>H<sub>10</sub>ClF<sub>3</sub>NO (M + H)<sup>+</sup>: calcd: 324.0398, found: 324.0392.

### **5-(4-chlorophenyl)-2-(3-fluoro-5-(trifluoromethyl)phenyl)oxazole (3k)**

Yield: 51%; yellow gummy;  $^1\text{H}$  NMR (400 MHz,  $\text{CDCl}_3$ )  $\delta$  8.15 (s, 1H), 7.97 (d,  $J = 8.8$  Hz, 1H), 7.67 (d,  $J = 8.6$  Hz, 2H), 7.45 (dd,  $J = 18.2, 9.5$  Hz, 4H);  $^{13}\text{C}$  NMR (101 MHz,  $\text{CDCl}_3$ )  $\delta$  162.7 (d,  $J = 249.8$  Hz), 151.4, 134.9, 131.5, 130.2 (d,  $J = 8.6$  Hz), 129.4 (2C), 128.9, 125.8, 125.7 (2C), 124.1, 123.8 (dd,  $J = 284.3, 145.8$  Hz), 119.0 – 118.8 (m), 116.5 (d,  $J = 24.8$  Hz), 114.5 (dd,  $J = 24.5, 3.7$  Hz); HRMS (ESI):  $m/z$  for  $\text{C}_{16}\text{H}_9\text{ClF}_4\text{NO}$  ( $\text{M} + \text{H}$ ) $^+$ : calcd: 342.0303, found: 342.0300.

### **5-(3-chlorophenyl)-2-phenyloxazole (3l)<sup>2</sup>**

Yield: 70%; white gummy;  $^1\text{H}$  NMR (400 MHz,  $\text{CDCl}_3$ )  $\delta$  8.14 – 8.08 (m, 2H), 7.71 (s, 1H), 7.59 (d,  $J = 7.6$  Hz, 1H), 7.52 – 7.45 (m, 4H), 7.38 (t,  $J = 7.7$  Hz, 1H), 7.31 (d,  $J = 7.9$  Hz, 1H);  $^{13}\text{C}$  NMR (101 MHz,  $\text{CDCl}_3$ )  $\delta$  161.6, 149.9, 135.0, 130.6, 130.3, 129.7, 128.9 (2C), 128.4, 127.2, 126.4 (2C), 124.4, 124.2, 122.2.

### **5-(3-chlorophenyl)-2-(2-fluorophenyl)oxazole (3m)**

Yield: 61%; white gummy;  $^1\text{H}$  NMR (400 MHz,  $\text{CDCl}_3$ )  $\delta$  8.11 (t,  $J = 7.5$  Hz, 1H), 7.72 (s, 1H), 7.62 (d,  $J = 7.6$  Hz, 1H), 7.53 (s, 1H), 7.47 (dd,  $J = 11.7, 5.9$  Hz, 1H), 7.39 (t,  $J = 7.8$  Hz, 1H), 7.35 – 7.27 (m, 2H), 7.23 (d,  $J = 10.0$  Hz, 1H).  $^{13}\text{C}$  NMR (101 MHz,  $\text{CDCl}_3$ )  $\delta$  160.10 (d,  $J = 257.5$  Hz), 135.06, 132.19 (d,  $J = 8.6$  Hz), 130.30 (2C), 129.47 – 129.40 (m), 128.58 (2C), 124.45 (d,  $J = 3.7$  Hz), 124.31 (d,  $J = 3.9$  Hz) (2C), 122.39 (2C), 116.99 (d,  $J = 21.3$  Hz), 115.53. HRMS (ESI):  $m/z$  for  $\text{C}_{15}\text{H}_{10}\text{ClFNO}$  ( $\text{M} + \text{H}$ ) $^+$ : calcd: 274.0357, found: 274.0361.

### **2-phenyl-5-(p-tolyl)oxazole (3n)<sup>3</sup>**

Yield: 56%; white solid. m.p. 73-76 °C;  $^1\text{H}$  NMR (400 MHz,  $\text{CDCl}_3$ )  $\delta$  8.01 (d,  $J = 8.0$  Hz, 2H), 7.70 – 7.60 (m, 2H), 7.55 (t,  $J = 7.7$  Hz, 2H), 7.48 (s, 1H), 7.29 (s, 2H), 2.44 (s, 3H).  $^{13}\text{C}$  NMR (101 MHz,  $\text{CDCl}_3$ )  $\delta$  160.3, 151.1, 138.5, 130.4, 130.3, 128.8, 128.7, 128.3, 127.2, 126.1, 122.8, 19.8.

### **2-(2-fluorophenyl)-5-(p-tolyl)oxazole (3o)**

Yield: 49%; white gummy;  $^1\text{H}$  NMR (400 MHz,  $\text{CDCl}_3$ )  $\delta$  8.11 (td,  $J = 7.6, 1.7$  Hz, 1H), 7.64 (d,  $J = 8.2$  Hz, 2H), 7.46 (s, 1H), 7.30 – 7.20 (m, 4H), 2.40 (s, 3H);  $^{13}\text{C}$  NMR (101 MHz,  $\text{CDCl}_3$ )  $\delta$  160.01 (d,  $J = 257.1$  Hz), 157.18, 151.75, 138.71, 131.75 (d,  $J = 8.4$  Hz), 129.65 (2C), 129.30 (d,  $J = 1.8$  Hz), 125.08, 124.37, 124.33 (2C), 122.78, 116.92 (d,  $J = 21.4$  Hz),

115.83 (d,  $J = 10.8$  Hz), 21.40; HRMS (ESI):  $m/z$  for  $C_{16}H_{13}FNO$  ( $M + H$ )<sup>+</sup>: calcd: 254.0976, found: 254.0976.

### **2-(4-fluorophenyl)-5-(p-tolyl)oxazole (3p)**

Yield: 53%; white solid. m.p. 85-89 °C; <sup>1</sup>H NMR (400 MHz, CDCl<sub>3</sub>) δ 8.14 – 8.06 (m, 2H), 7.61 (d,  $J = 8.2$  Hz, 2H), 7.38 (s, 1H), 7.26 (d,  $J = 7.4$  Hz, 2H), 7.17 (t,  $J = 8.7$  Hz, 2H), 2.40 (s, 3H); <sup>13</sup>C NMR (101 MHz, CDCl<sub>3</sub>) δ 163.99 (d,  $J = 250.8$  Hz), 160.03, 151.58, 138.60, 129.65 (2C), 128.32 (d,  $J = 8.6$  Hz), 125.18, 124.17 (2C), 123.94 (d,  $J = 3.3$  Hz), 122.74, 116.00 (d,  $J = 22.2$  Hz), 21.38; HRMS (ESI):  $m/z$  for  $C_{16}H_{13}FNO$  ( $M + H$ )<sup>+</sup>: calcd: 254.0976, found: 254.0988.

### **5-(4-(tert-butyl)phenyl)-2-(2-fluorophenyl)oxazole (3q)**

Yield: 50%; white gummy; <sup>1</sup>H NMR (400 MHz, CDCl<sub>3</sub>) δ 8.11 (td,  $J = 7.6, 1.7$  Hz, 1H), 7.68 (d,  $J = 8.5$  Hz, 2H), 7.48 (d,  $J = 8.6$  Hz, 3H), 7.30 – 7.20 (m, 3H), 1.36 (s, 9H); <sup>13</sup>C NMR (101 MHz, CDCl<sub>3</sub>) δ 160.00 (d,  $J = 257.2$  Hz), 157.22 (d,  $J = 5.0$  Hz), 151.93, 151.70, 131.74 (d,  $J = 8.4$  Hz), 131.25, 129.29 (d,  $J = 1.7$  Hz), 125.89 (2C), 125.58 (d,  $J = 3.9$  Hz), 125.04, 124.35 (d,  $J = 3.7$  Hz), 124.20 (2C), 122.87, 120.68, 116.91 (d,  $J = 21.4$  Hz), 31.23, 29.71; HRMS (ESI):  $m/z$  for  $C_{19}H_{19}FNO$  ( $M + H$ )<sup>+</sup>: calcd: 296.1445, found: 296.1454.

### **5-(4-(tert-butyl)phenyl)-2-(4-chlorophenyl)oxazole (3r)**

Yield: 52%; white gummy; <sup>1</sup>H NMR (400 MHz, CDCl<sub>3</sub>) δ 8.04 (d,  $J = 8.6$  Hz, 2H), 7.65 (d,  $J = 8.4$  Hz, 2H), 7.47 (dd,  $J = 8.4, 6.3$  Hz, 4H), 7.40 (s, 1H), 1.36 (s, 9H); <sup>13</sup>C NMR (101 MHz, CDCl<sub>3</sub>) δ 13C NMR (101 MHz, CDCl<sub>3</sub>) δ 159.98, 151.98, 151.75, 136.31, 129.50, 129.15, 127.50, 125.92, 125.46, 124.12, 122.97, 31.23, 29.71; HRMS (ESI):  $m/z$  for  $C_{19}H_{19}ClNO$  ( $M + H$ )<sup>+</sup>: calcd: 312.1150, found: 312.1159.

### **2-(4-methoxyphenyl)-5-phenyloxazole (3s)<sup>4</sup>**

<sup>1</sup>H NMR (400 MHz, CDCl<sub>3</sub>) δ 8.05 (d,  $J = 7.9$  Hz, 2H), 7.70 (d,  $J = 7.3$  Hz, 2H), 7.50 – 7.29 (m, 4H), 7.00 (d,  $J = 7.9$  Hz, 2H), 3.87 (s, 3H); <sup>13</sup>C NMR (101 MHz, CDCl<sub>3</sub>) δ 161.39, 161.30, 150.75, 128.91, 128.22, 127.98, 124.07, 123.29, 120.32, 114.27, 55.41.

#### 4. References

1. S. Samanta, R. R. Donthiri, M. Dinda and S. Adimurthy, *RSC Adv.*, 2015, **5**, 66718.
2. X. Yang, X. Guo, M. Qin, X. Yuan, H. Jing and B. Chen, *Org. Biomol. Chem.*, 2018, **16**, 3104.
3. H. Jiang, H. Huang, H. Cao and C. Qi, *Org. Lett.*, 2010, **12**, 5561.
4. C. W. Cheung and S. L. Buchwald, *J. Org. Chem.*, 2012, **77**, 7526.



#### **4. Copies of $^1\text{H}$ and $^{13}\text{C}$ NMR Spectra**

MP-OX-01

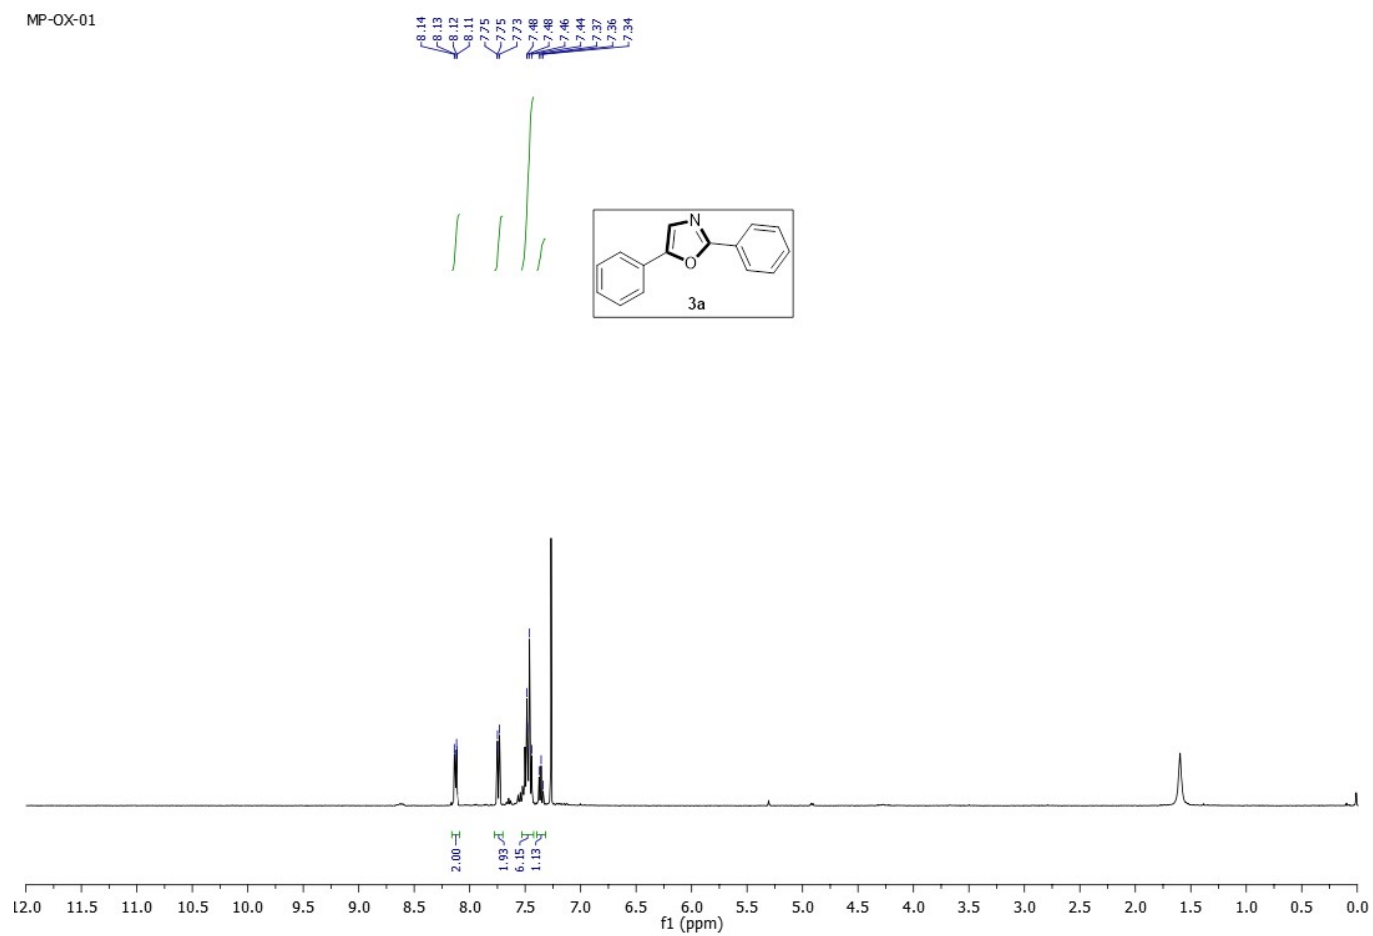

MP-OX-13C.1

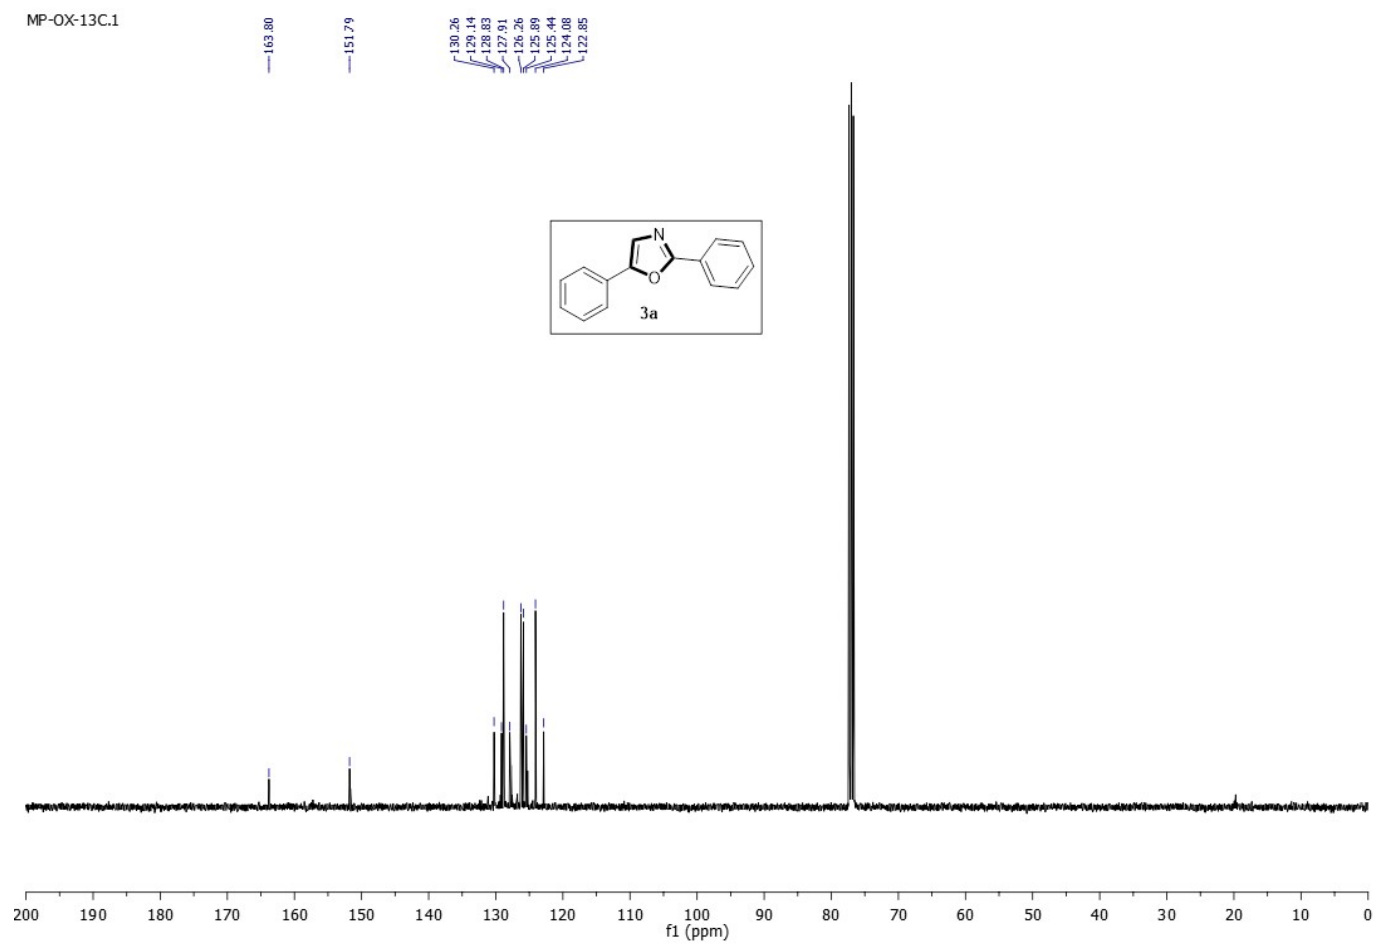

MP-OX-02

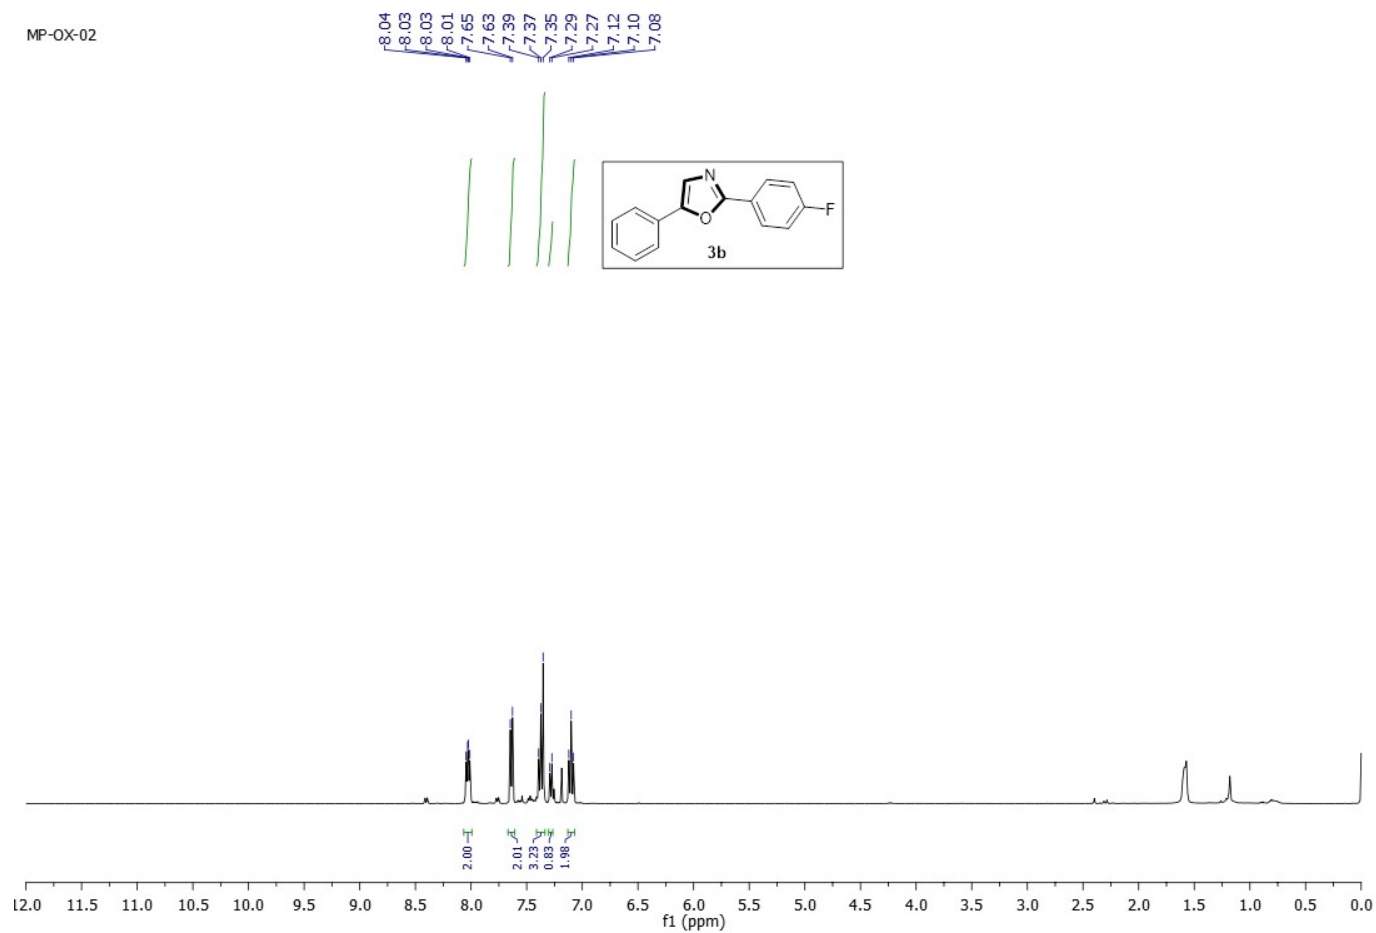

MP-OX-02

164.30  
161.80  
159.34  
150.36  
127.94  
127.50  
127.42  
127.34  
126.91  
123.18  
122.85  
122.82  
122.39  
115.12  
114.90

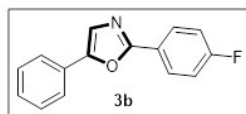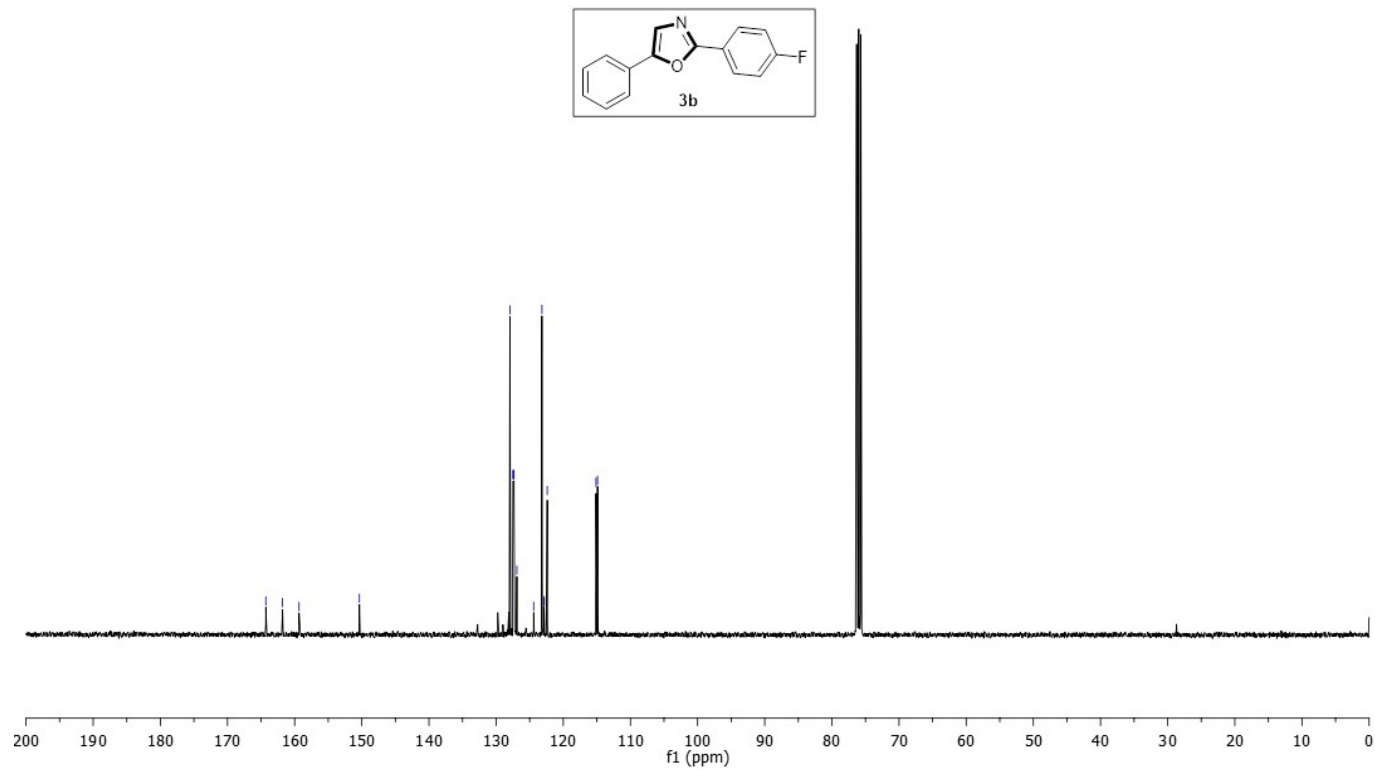

MP-OX-03

8.13  
8.11  
8.09  
7.75  
7.73  
7.51  
7.47  
7.45  
7.43  
7.37  
7.35  
7.33  
7.27  
7.25  
7.23  
7.21

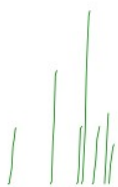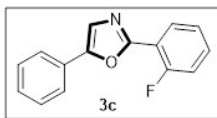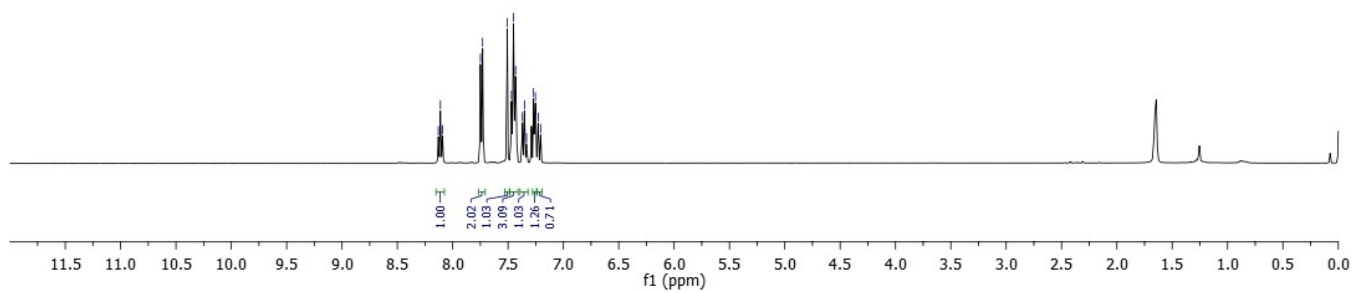

MP-OX-03

161.34  
158.78  
157.55  
157.51  
151.56  
151.54  
131.93  
129.37  
129.35  
128.97  
128.63  
124.40  
124.36  
123.41  
117.05  
116.83  
115.81  
115.70

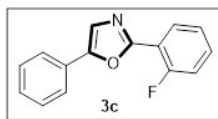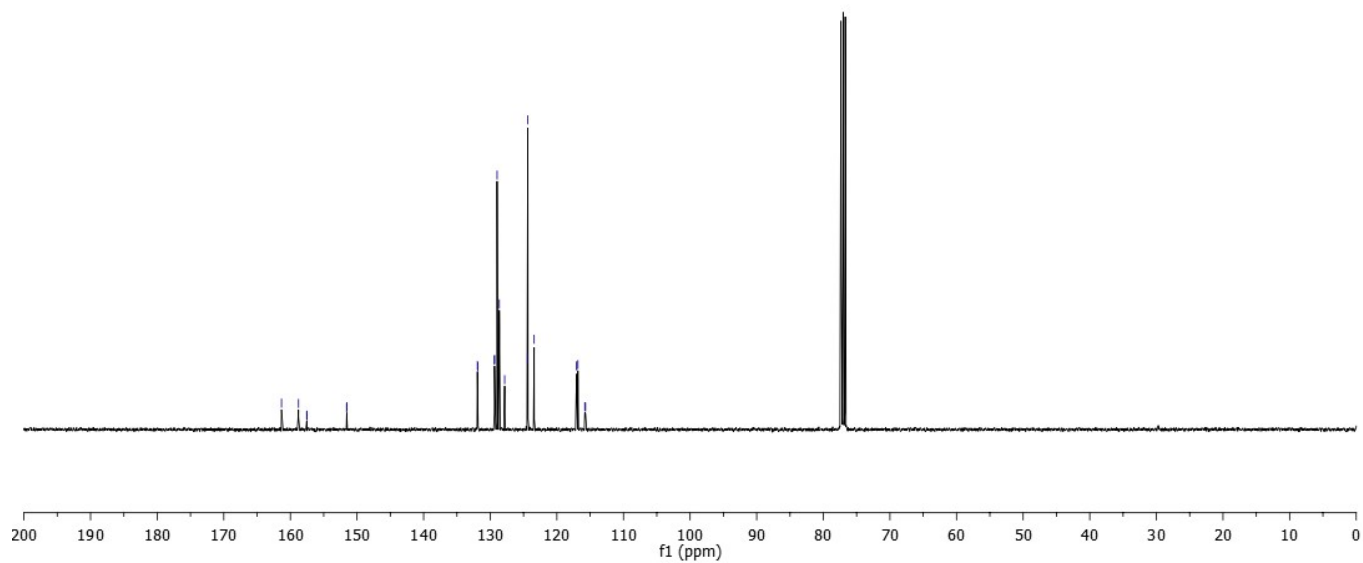

1H of TB-GM-227

7.98  
7.96  
7.66  
7.64  
7.40  
7.38  
7.30  
7.28  
7.26

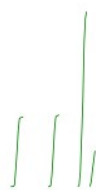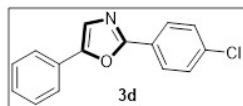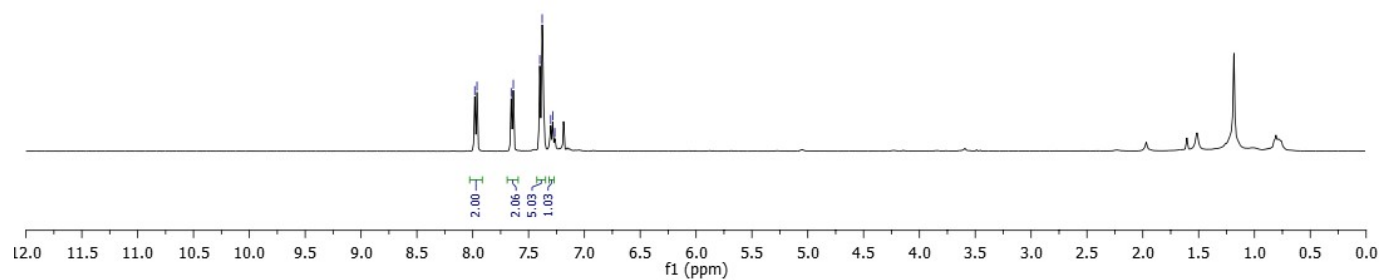



13C of TB-GM-227

159.21

150.52

135.38  
128.13  
127.95  
127.59  
126.81  
126.51  
124.89  
123.22  
122.53

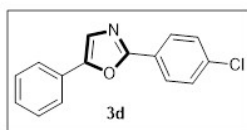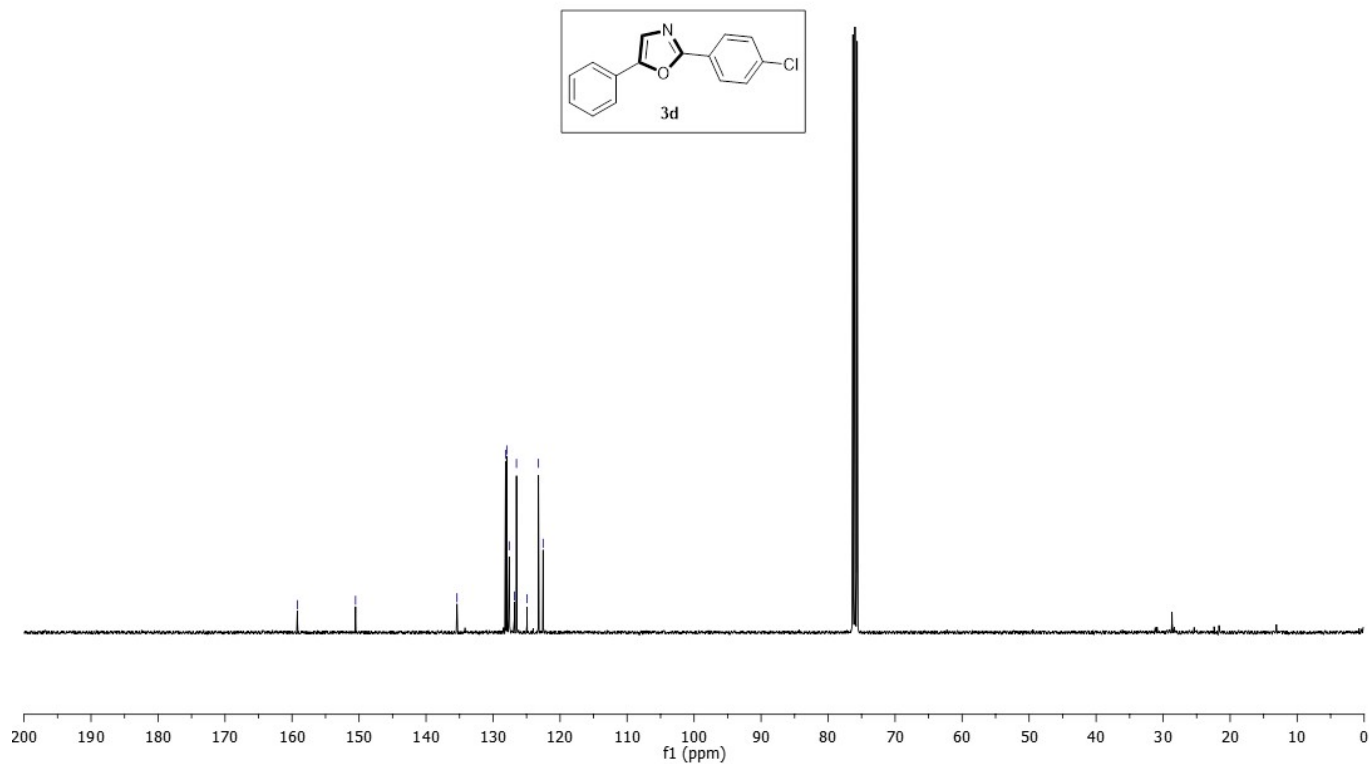

MP-OX-07

8.24  
8.22  
7.76  
7.74  
7.49  
7.47  
7.45  
7.40  
7.38  
7.36

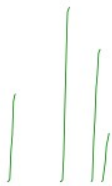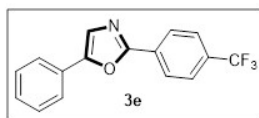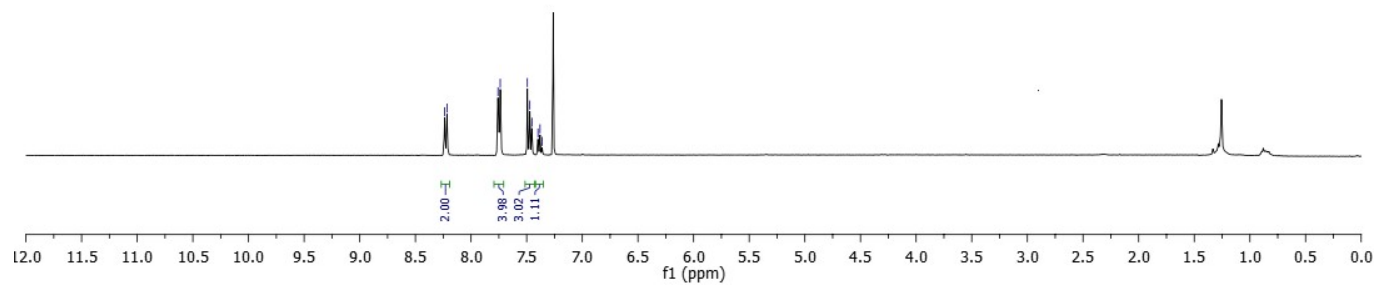

MP-OX-07

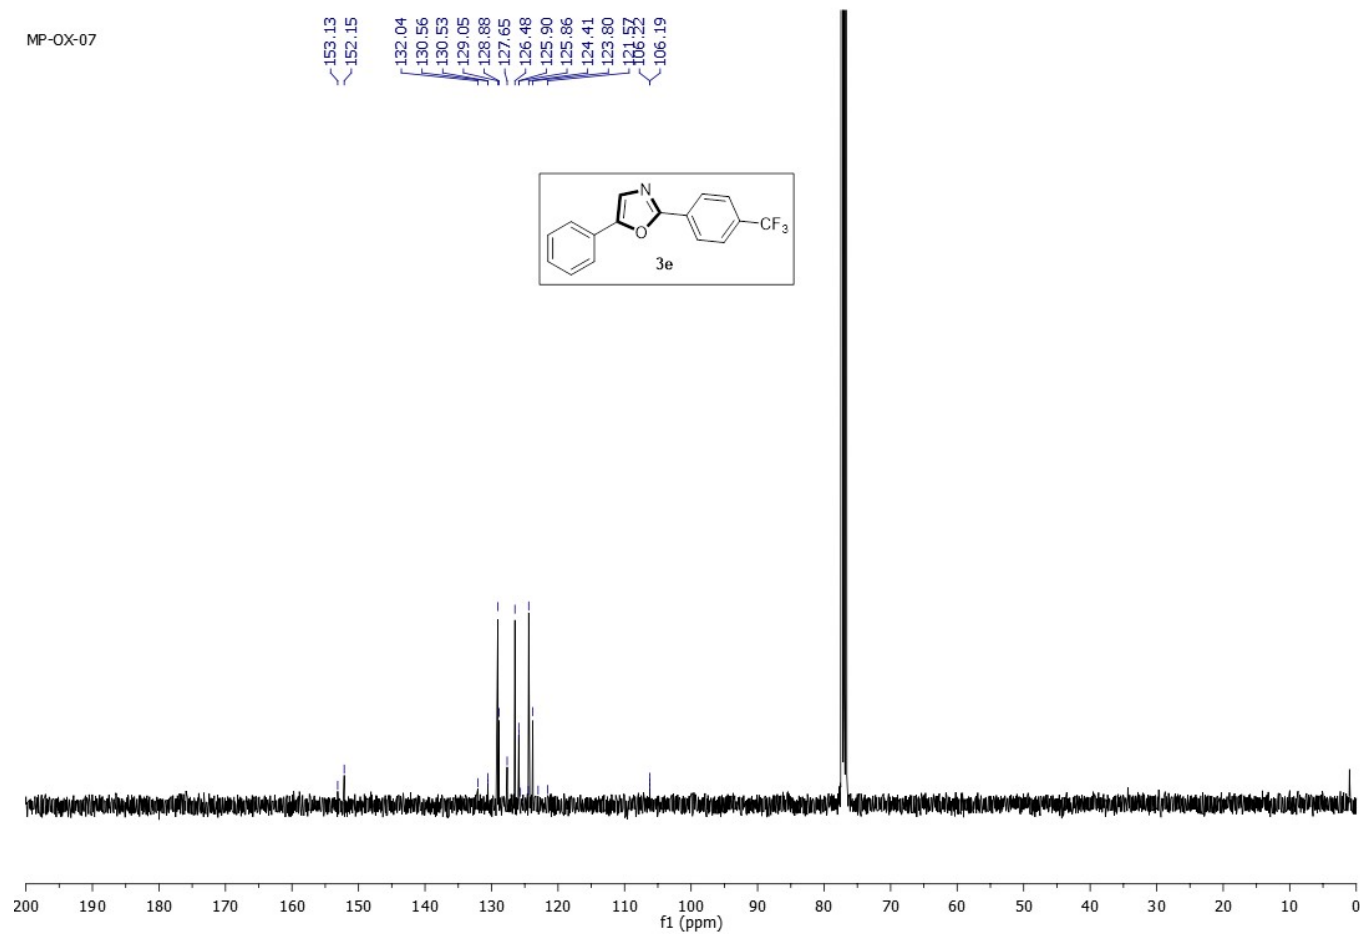

MP-OX-06

8.17  
7.99  
7.97  
7.75  
7.73  
7.49  
7.48  
7.46  
7.43  
7.41  
7.39  
7.37

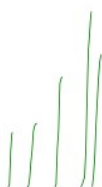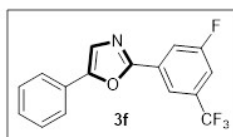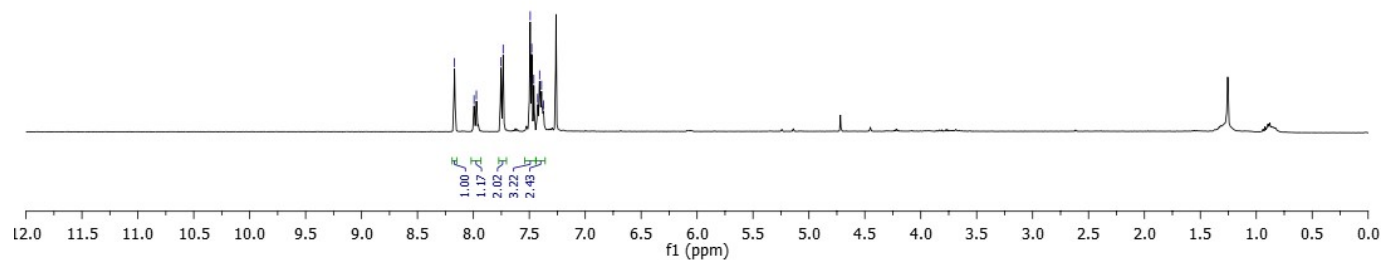

MP-OX-06

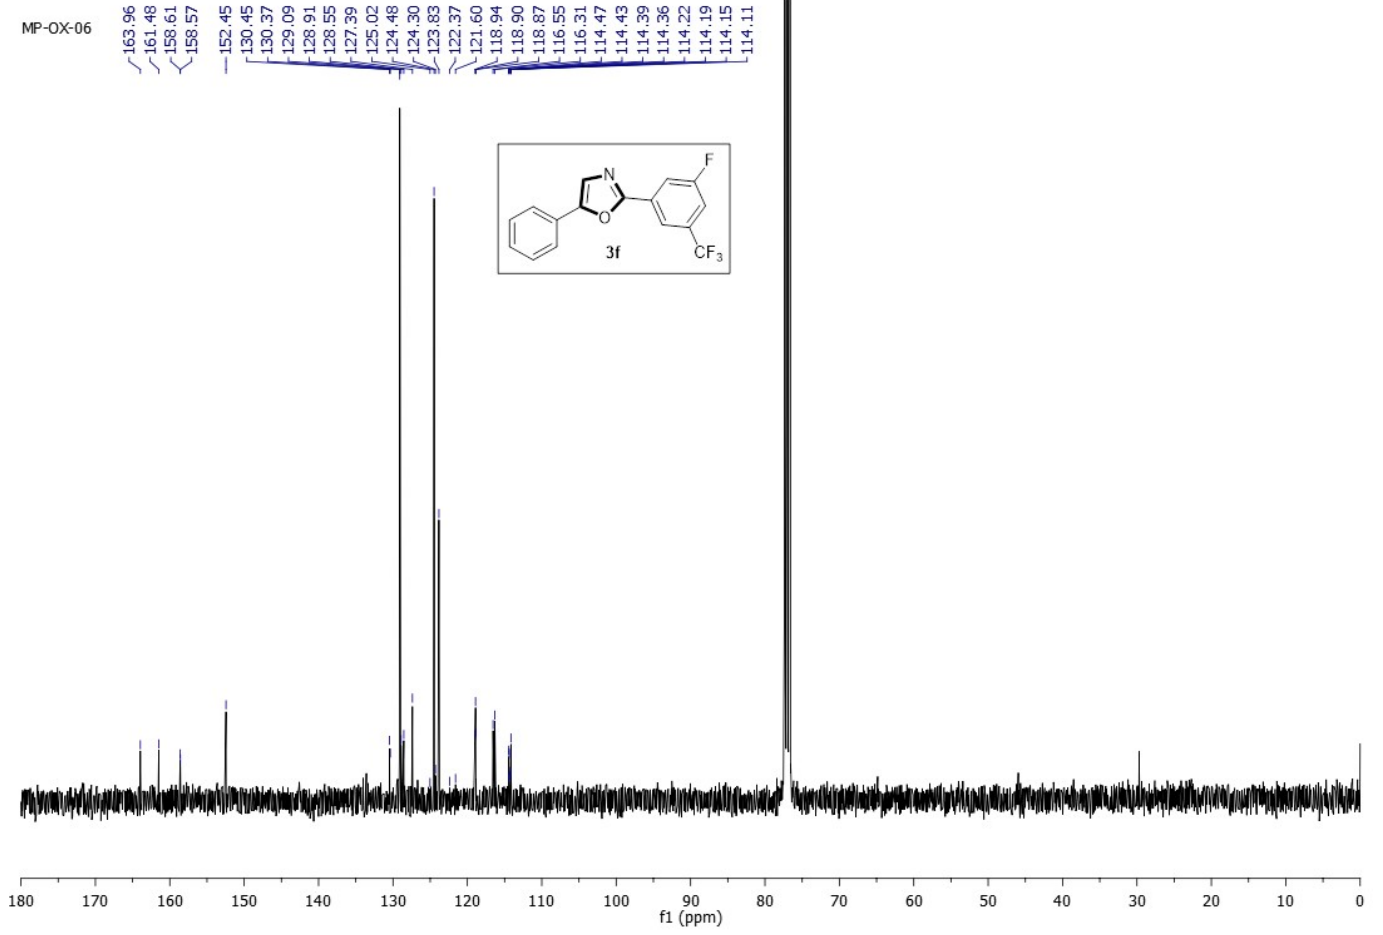

MP-OX-12

8.10  
8.09  
7.71  
7.70  
7.68  
7.49  
7.47  
7.38  
7.16  
7.14  
7.12

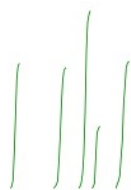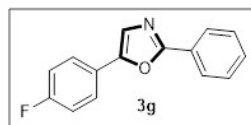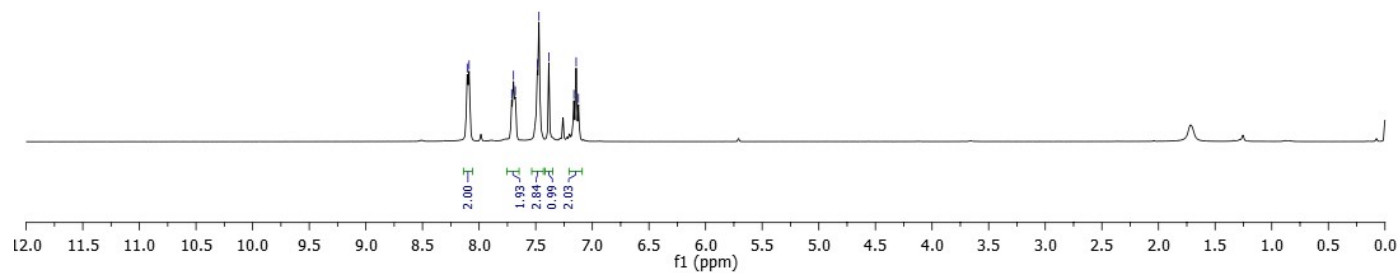

MP-OX-12

163.94  
161.47  
161.18  
150.47  
134.86  
131.69  
131.59  
130.41  
128.95  
127.95  
126.32  
126.15  
126.06  
124.90  
123.08  
116.23  
116.01

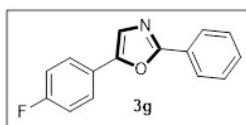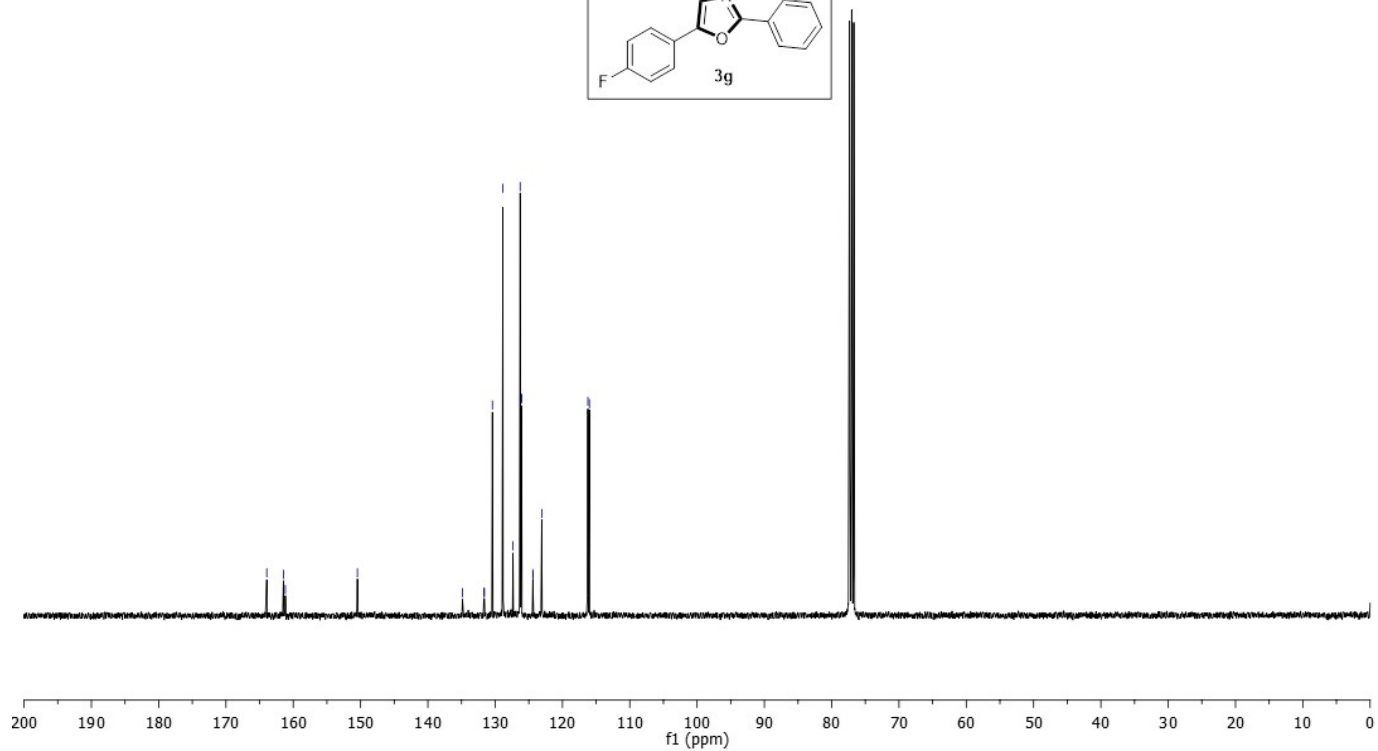

MP-OX-04

8.11  
8.11  
8.09  
7.67  
7.65  
7.49  
7.48  
7.44  
7.43  
7.41

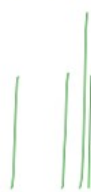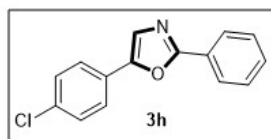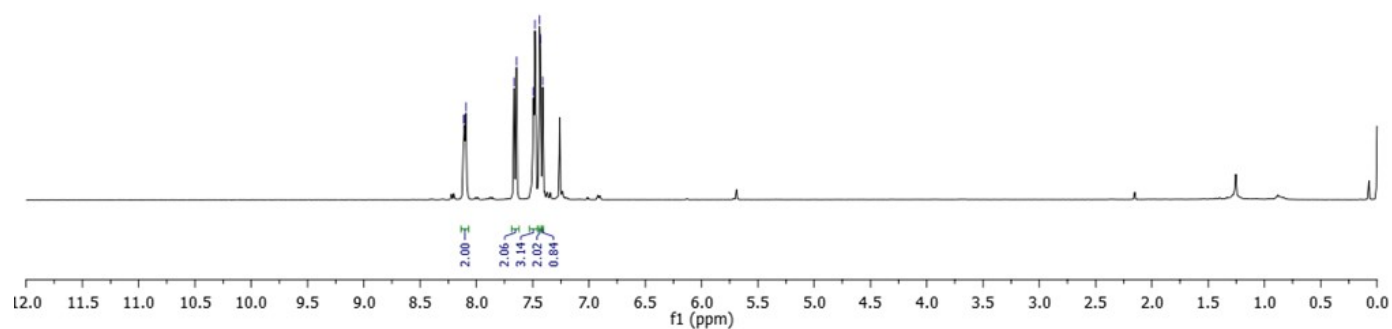



MP-OX-04

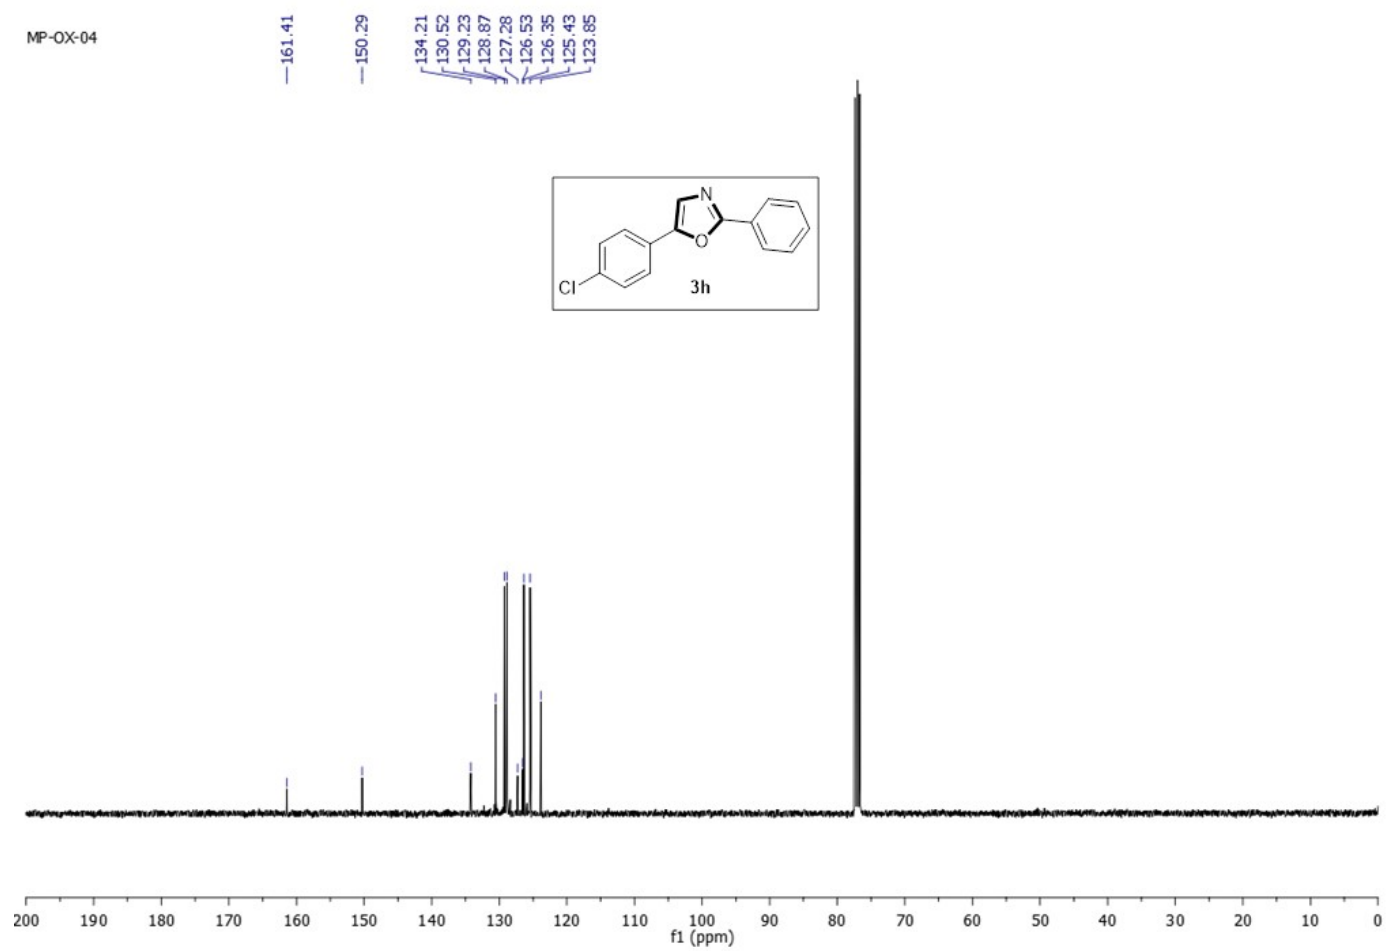

TB-GM-228

8.04  
8.03  
8.01  
7.57  
7.41  
7.40  
7.36  
7.35  
7.13  
7.11  
7.09

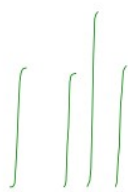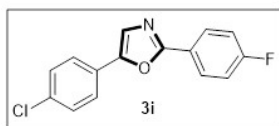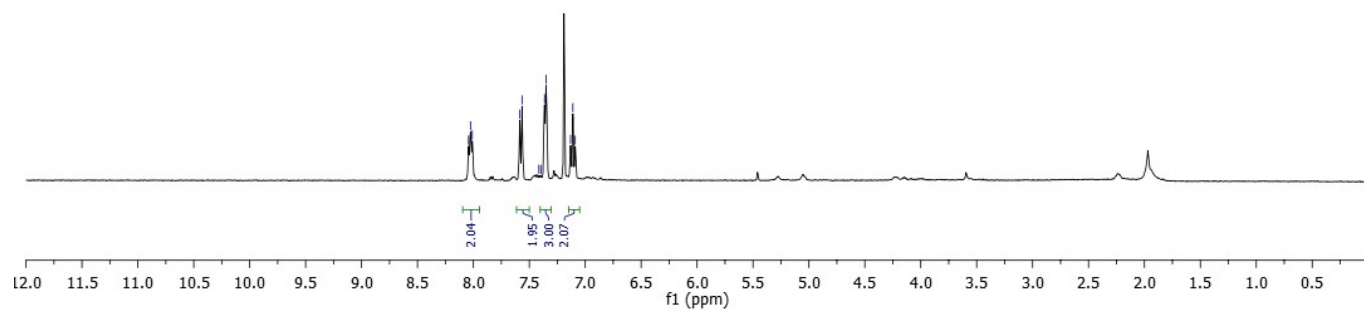

13C F of TB-GM-228

165.17

160.70

150.44

133.88

130.26

128.51

128.46

128.41

123.83

116.21

115.99

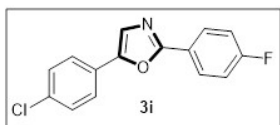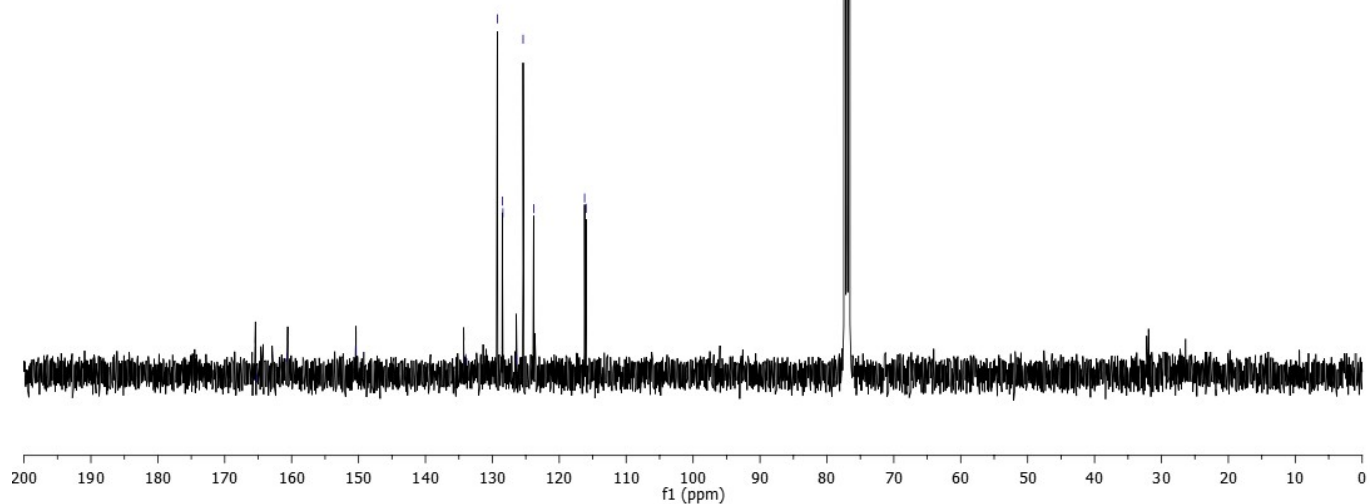

MP-OX-18

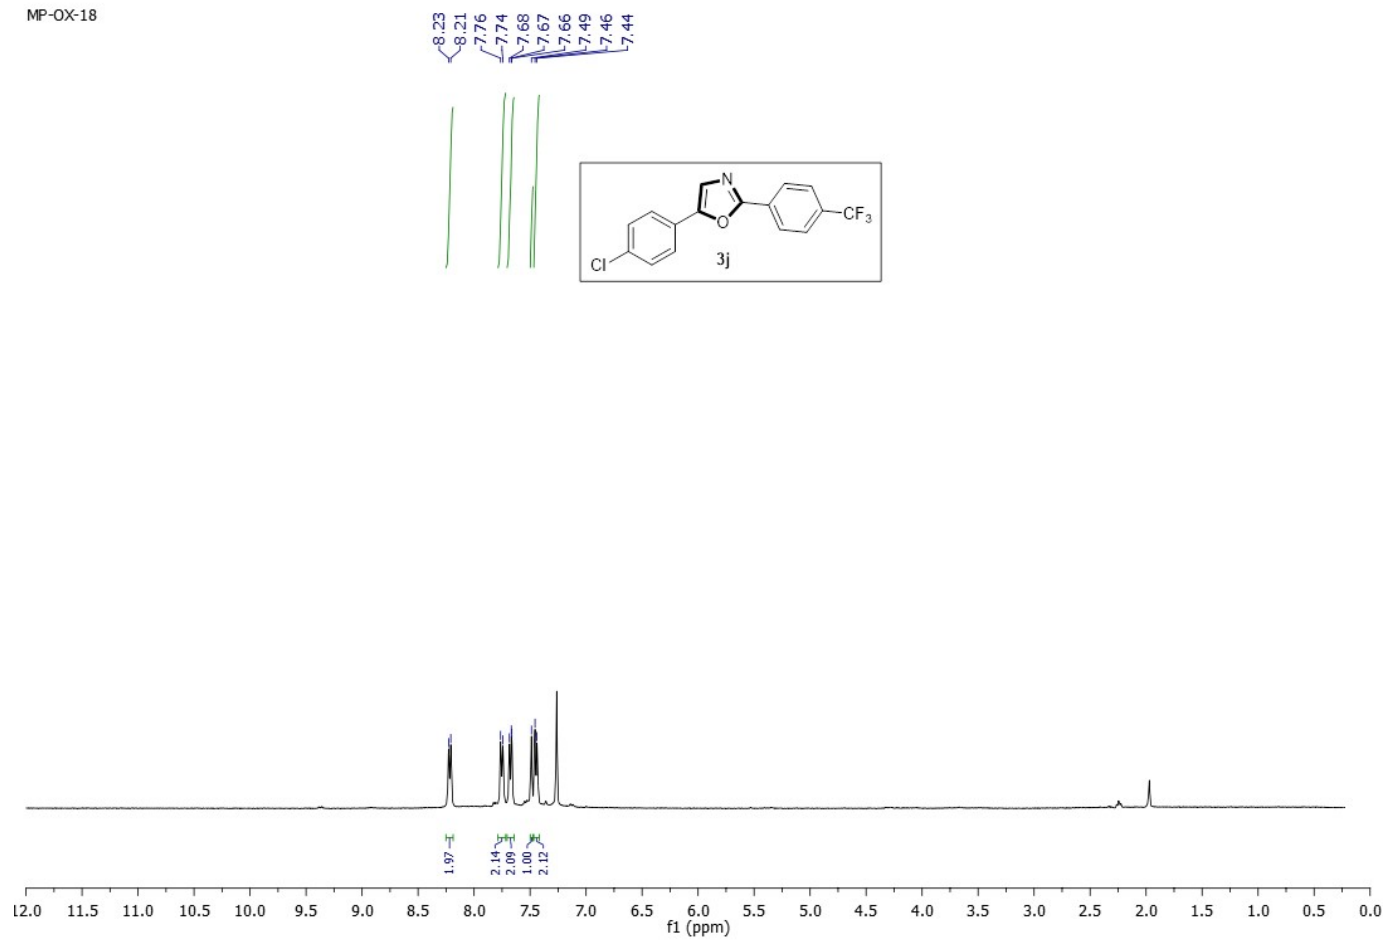

MP-OX-18 13C

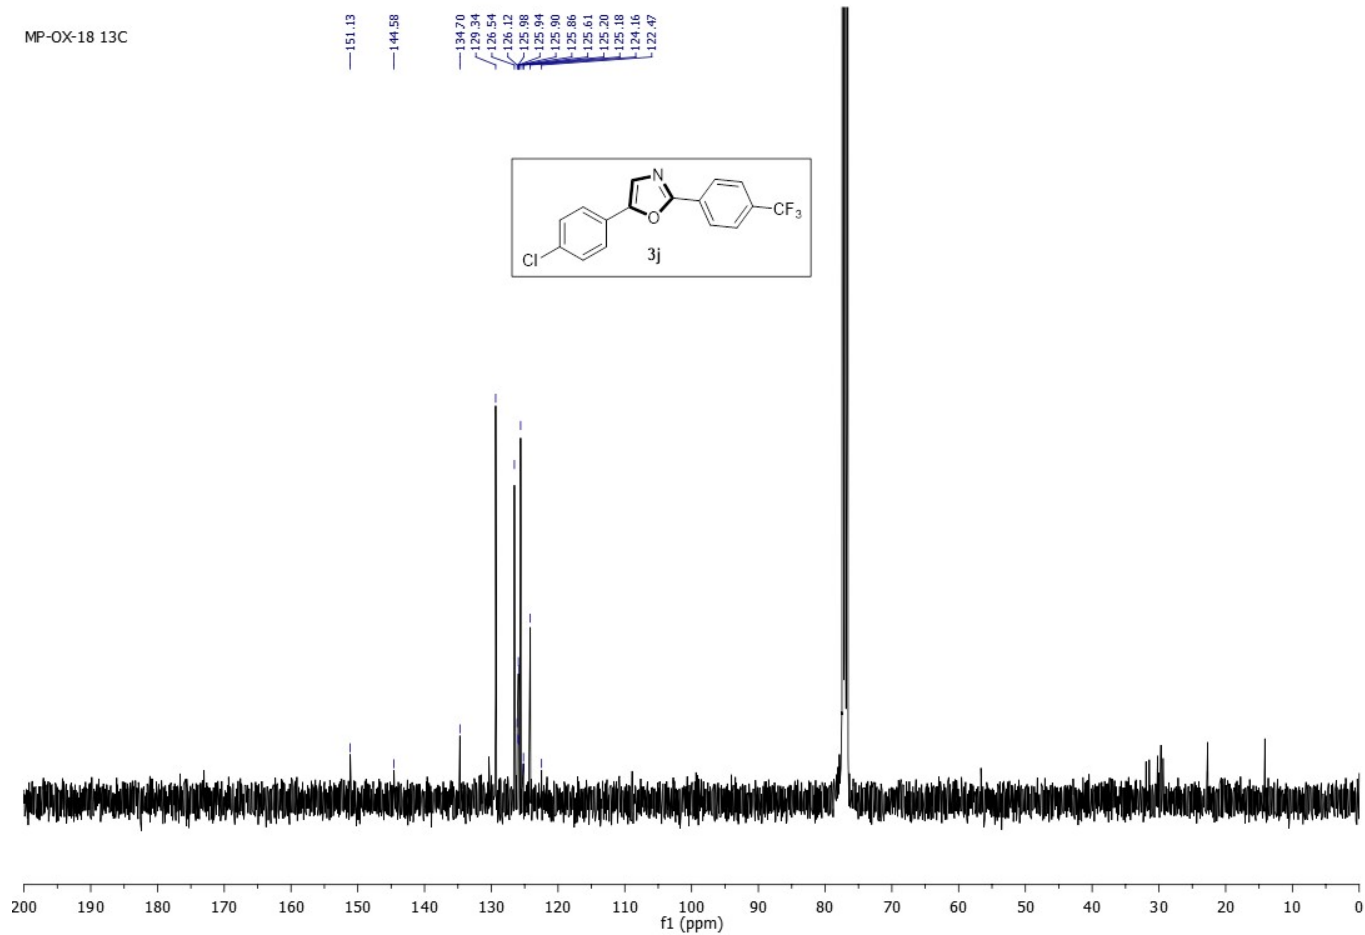

MP-OX-17

8.15  
7.98  
7.96  
7.68  
7.66  
7.48  
7.46  
7.44  
7.41

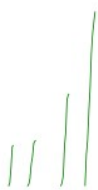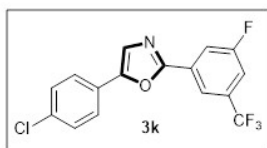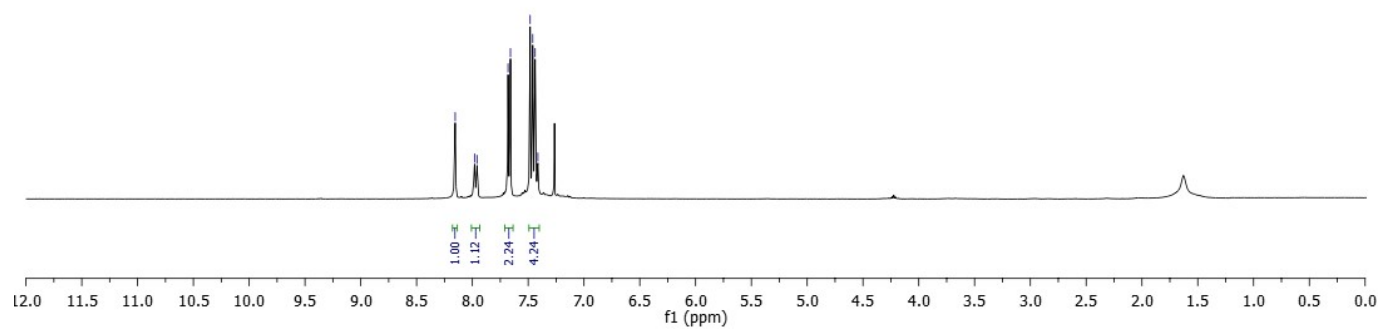

MP-OX-17 13C

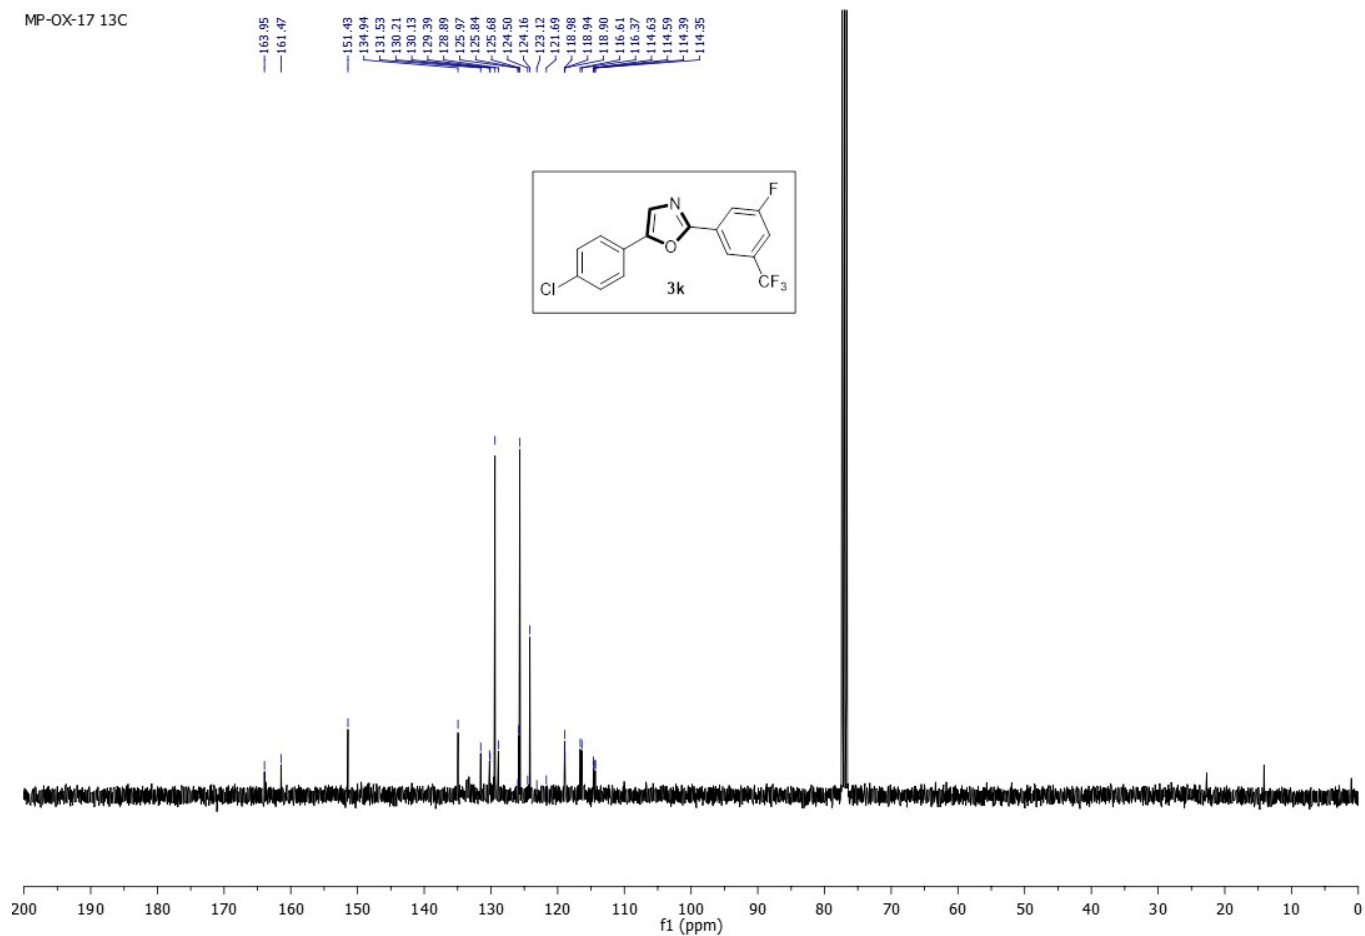

MP-OX-14

8.12  
8.12  
8.11  
7.71  
7.60  
7.59  
7.50  
7.49  
7.47  
7.40  
7.38  
7.36  
7.32  
7.30

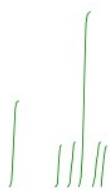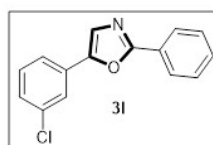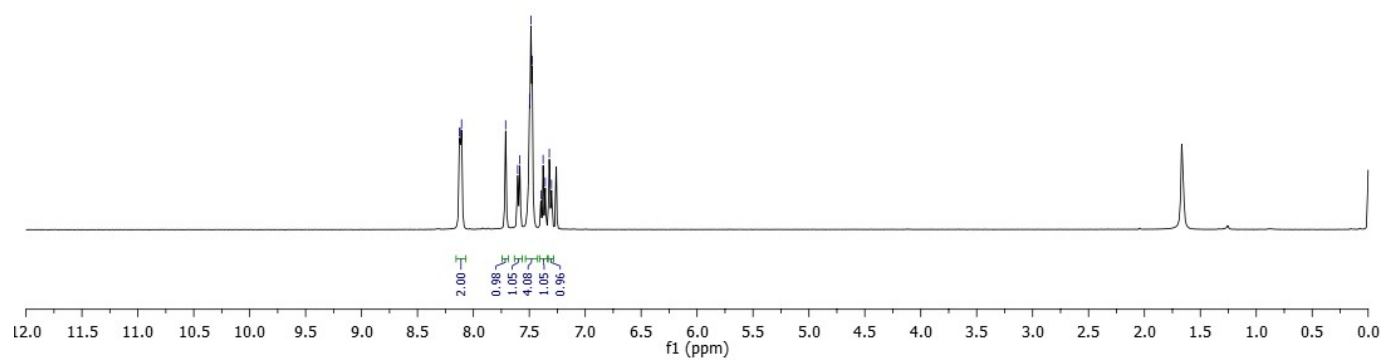



MP-OX-14

—161.63  
—149.90  
135.05  
130.63  
130.27  
129.67  
128.89  
128.39  
127.17  
126.43  
124.40  
124.17  
122.24

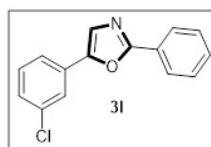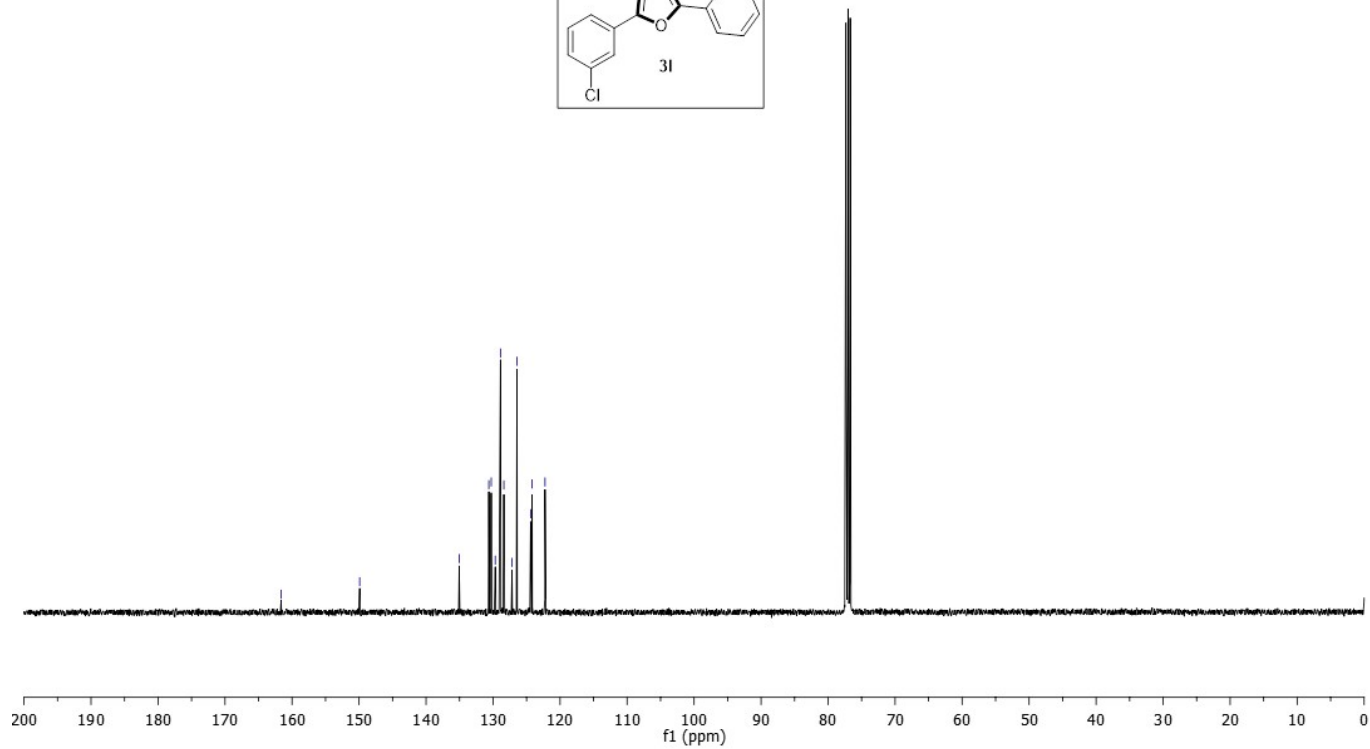

MP-OX-15

8.13  
8.11  
8.09  
7.72  
7.62  
7.61  
7.53  
7.49  
7.48  
7.46  
7.44  
7.41  
7.39  
7.37  
7.33  
7.31  
7.28  
7.24  
7.22

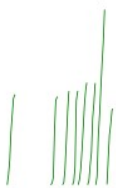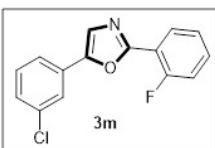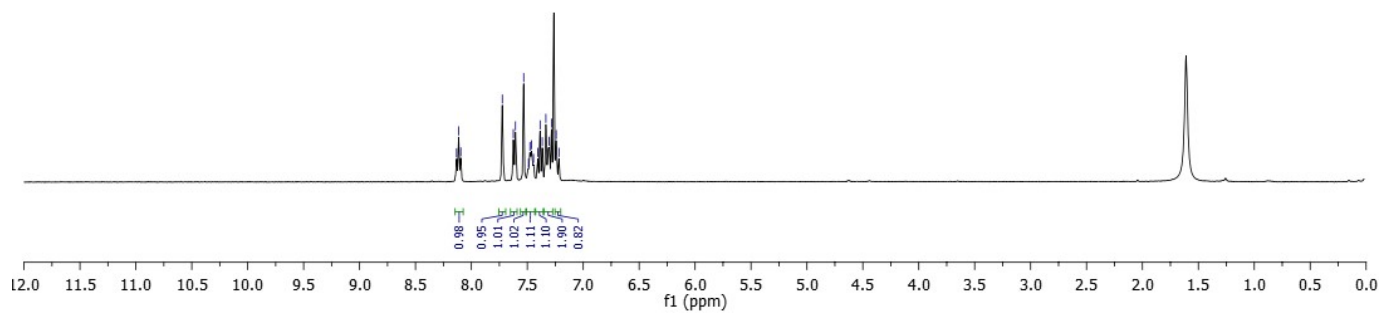

MP-OX-15 13C

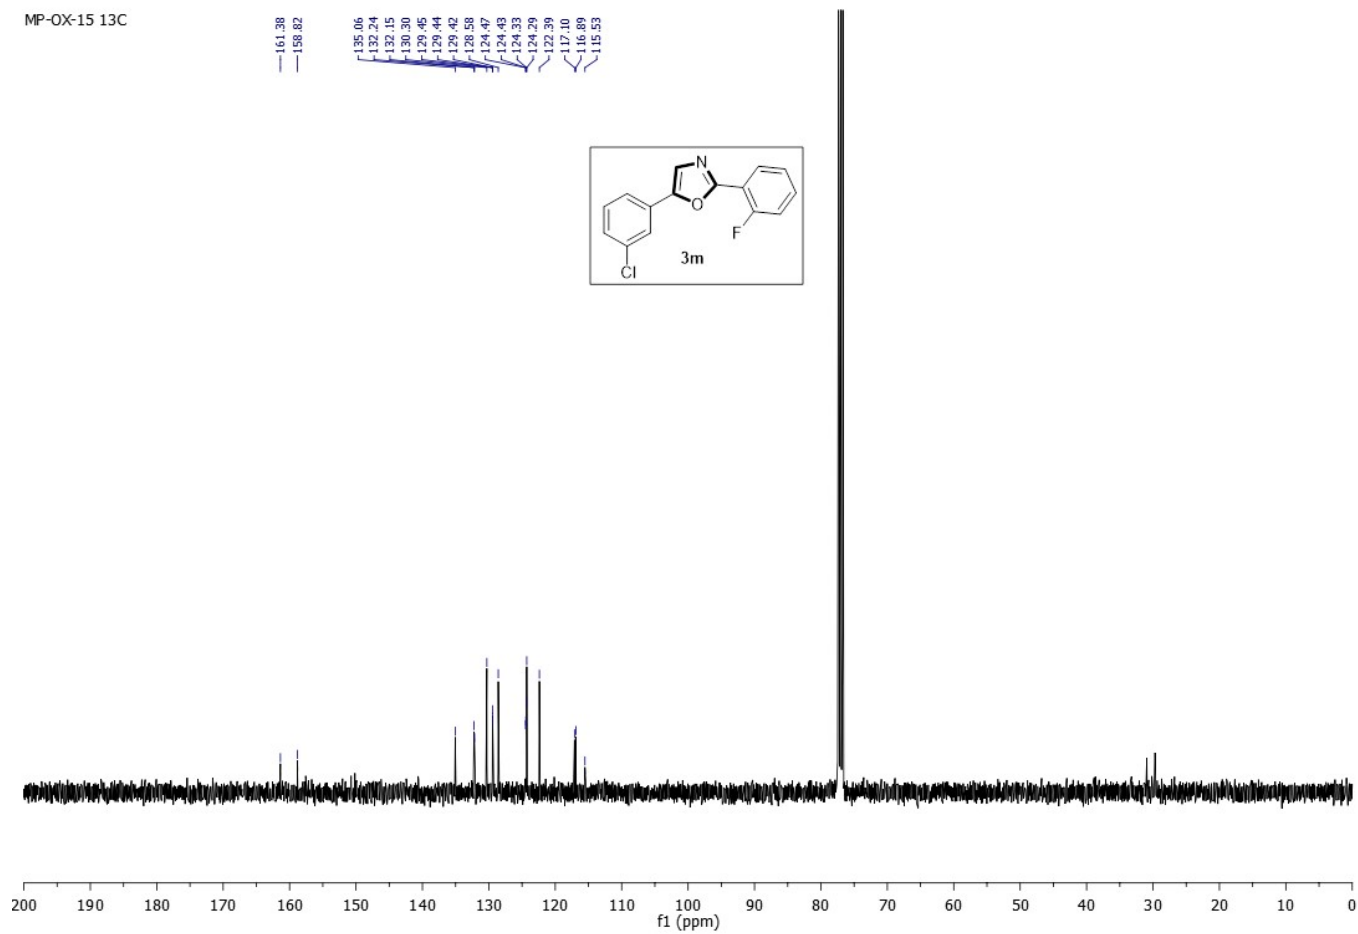

MP-OX-22 1H

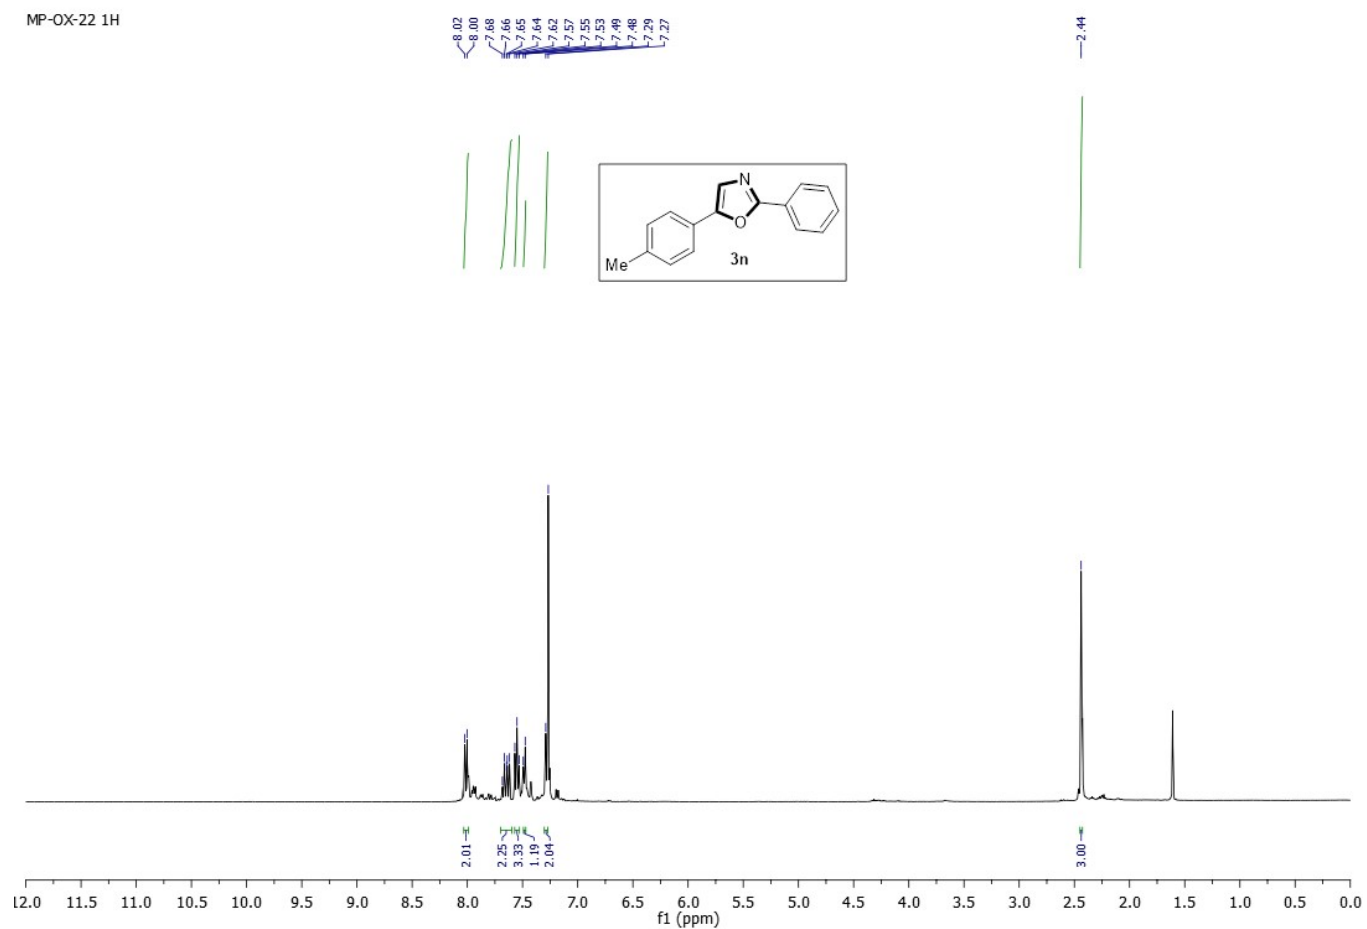

1H OF TB-KS-SB-490F

160.36

151.15

138.51

130.37

130.29

128.81

128.68

128.35

127.24

126.12

122.83

19.80

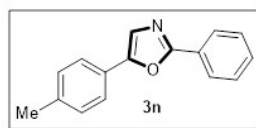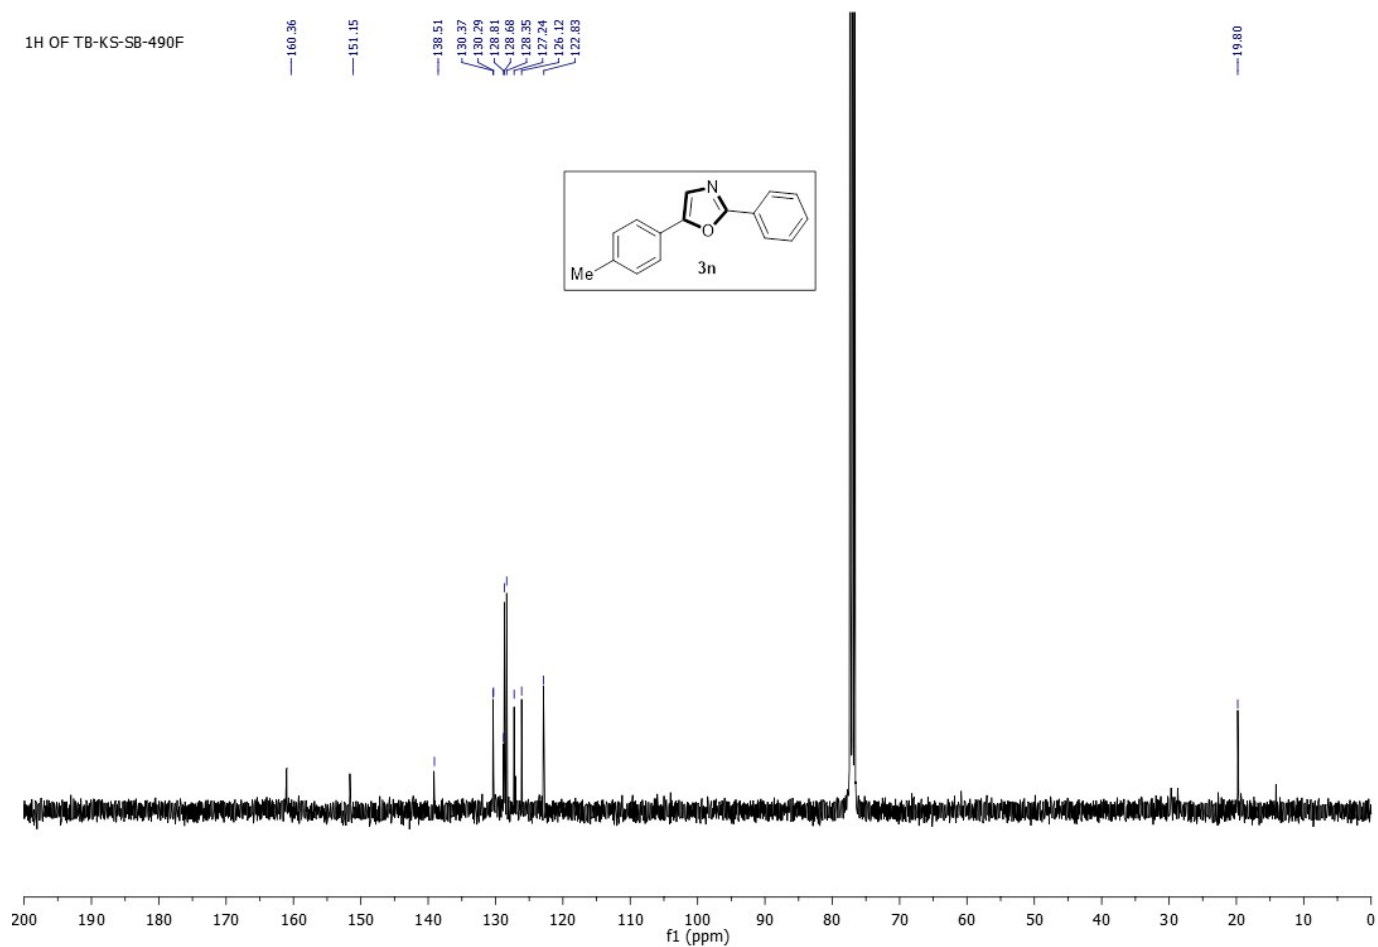

MP-OX-24

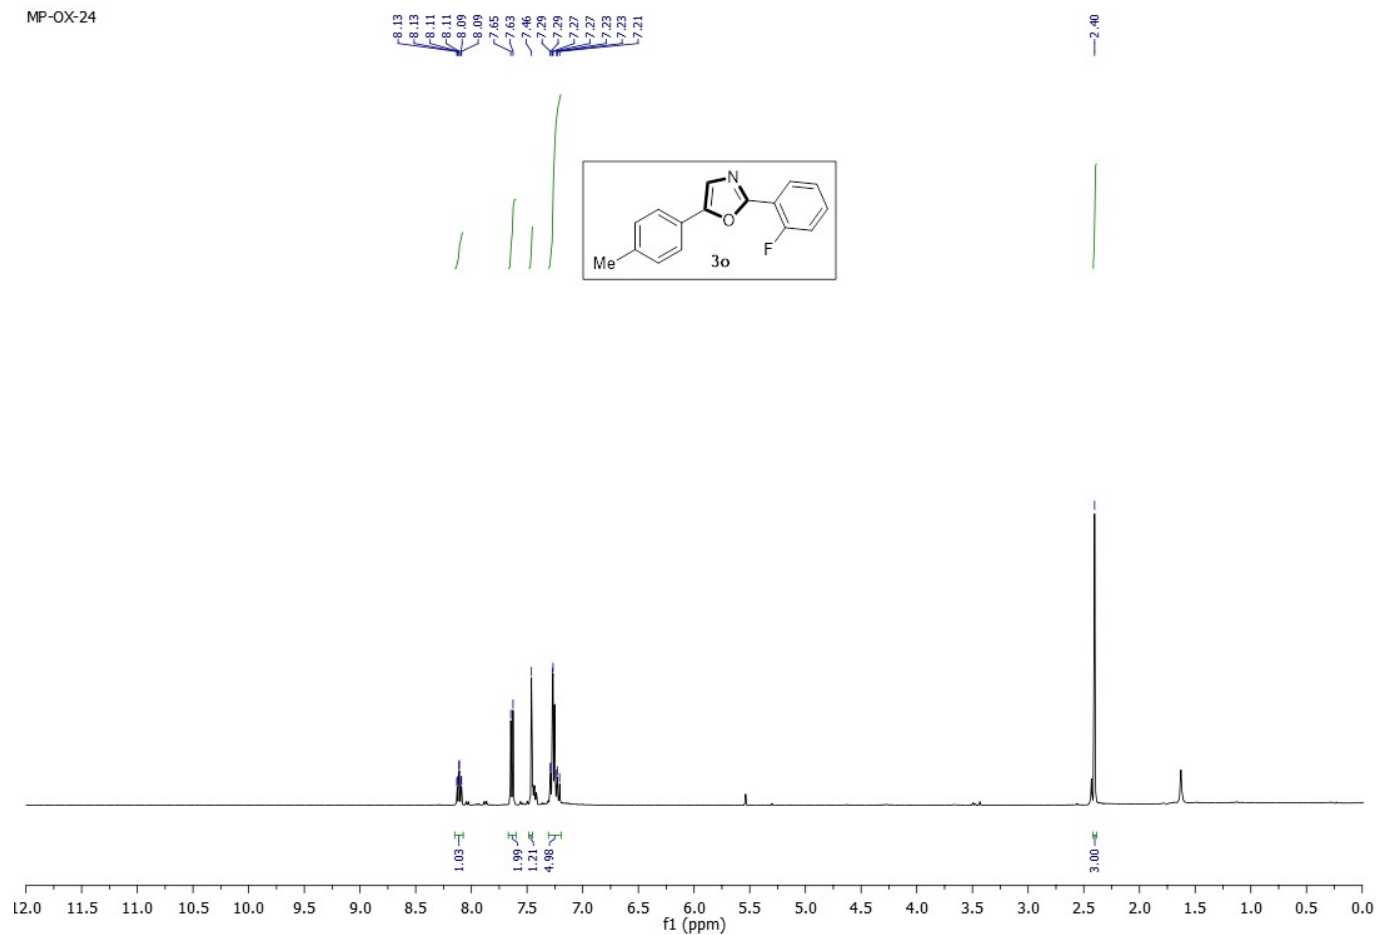

MP-OX-24 13C-1

161.29  
158.73  
157.18  
151.75

138.71  
131.79  
129.65  
129.31  
129.29  
124.37  
124.33  
117.03  
116.81  
115.88  
115.77

21.40

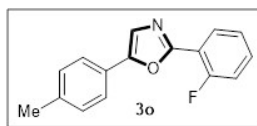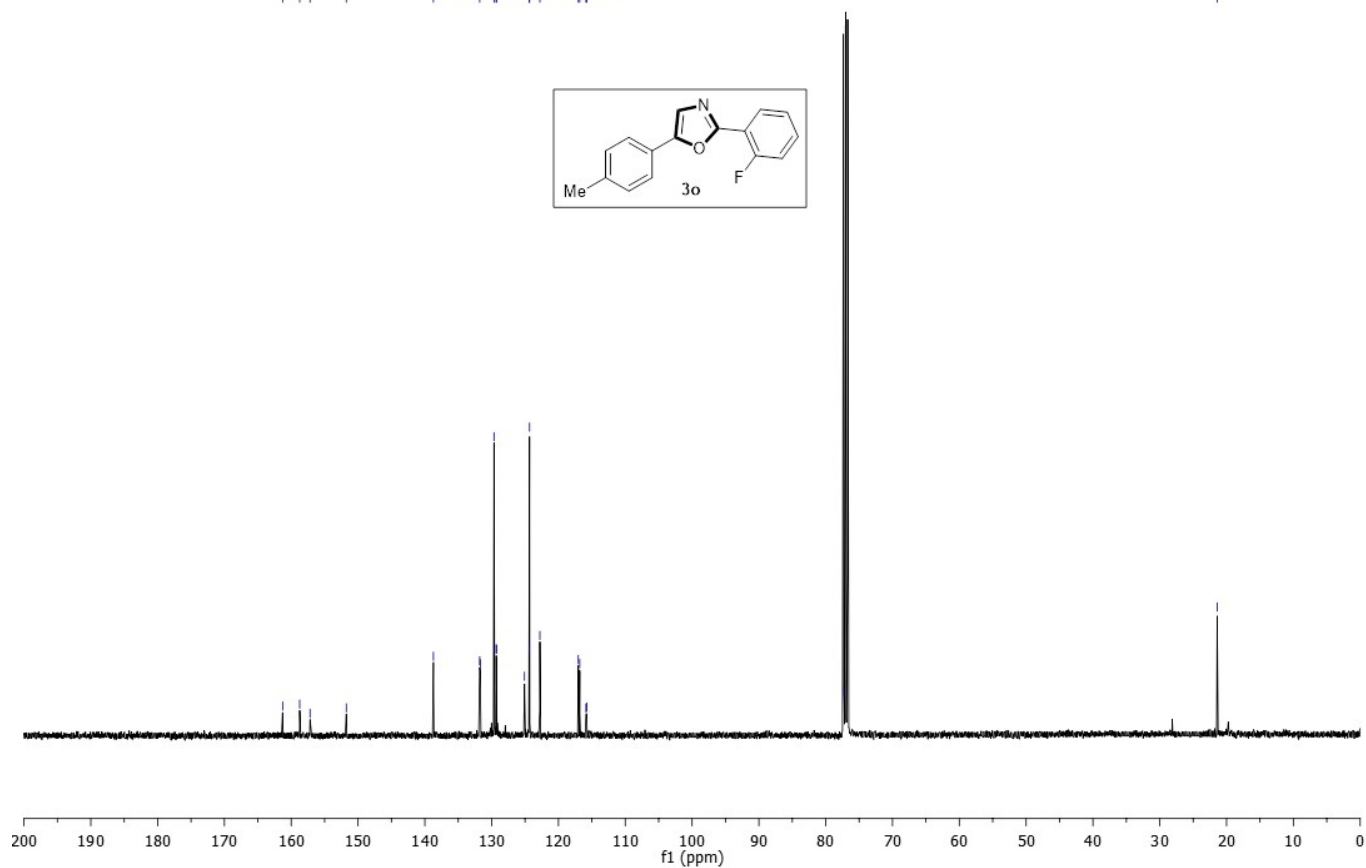

MP-OX-23

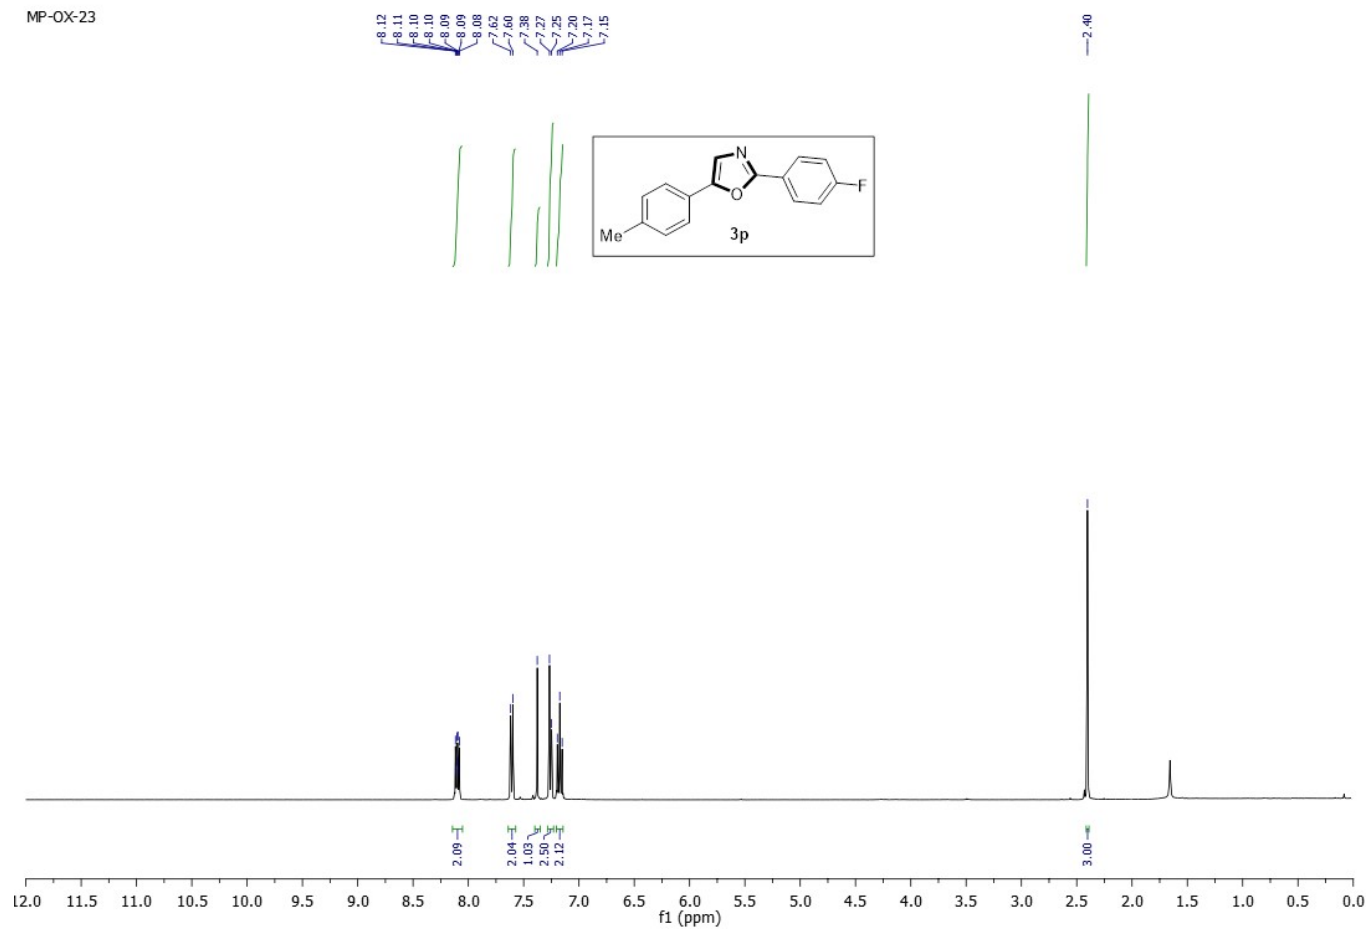



MP-OX-23 13C

165.24  
162.75  
160.03

151.98

138.60

129.65  
128.36  
128.28  
125.18  
124.17  
123.92  
116.71  
115.89

21.38

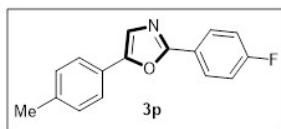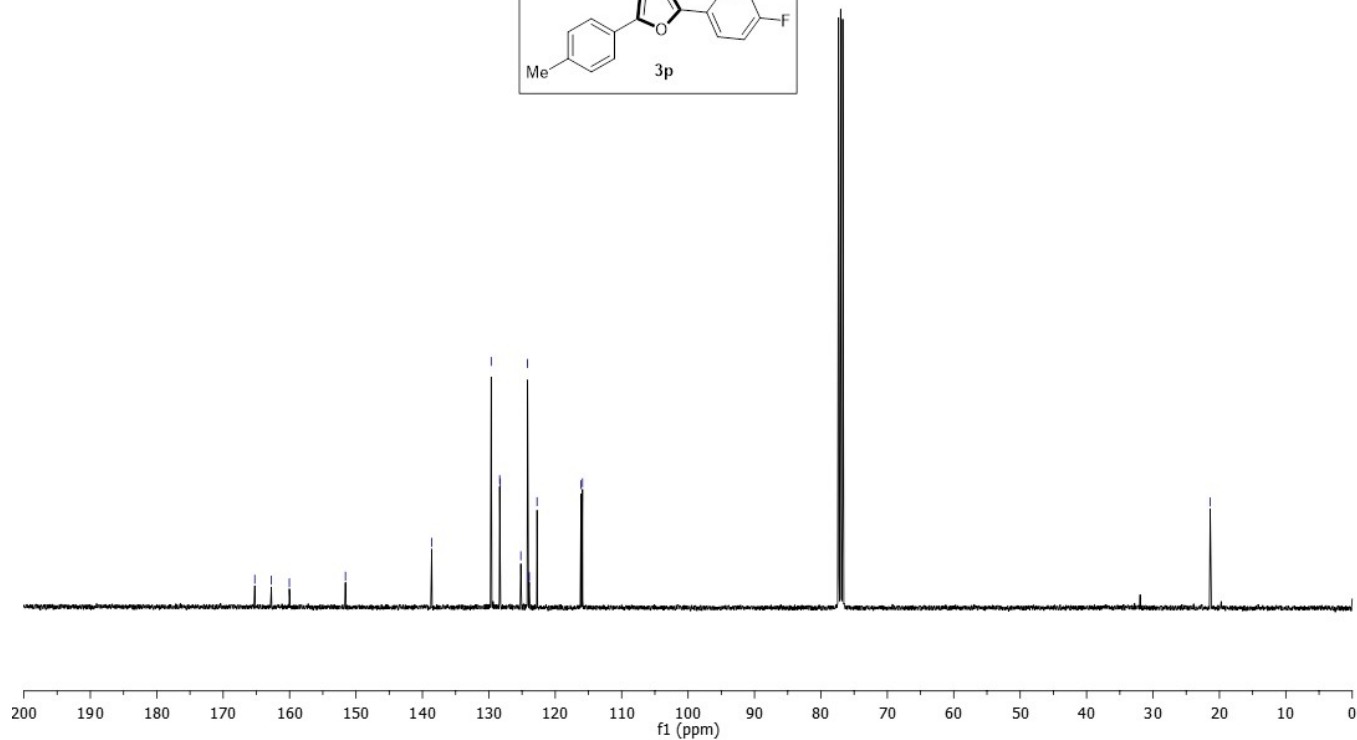

MP-OX-19

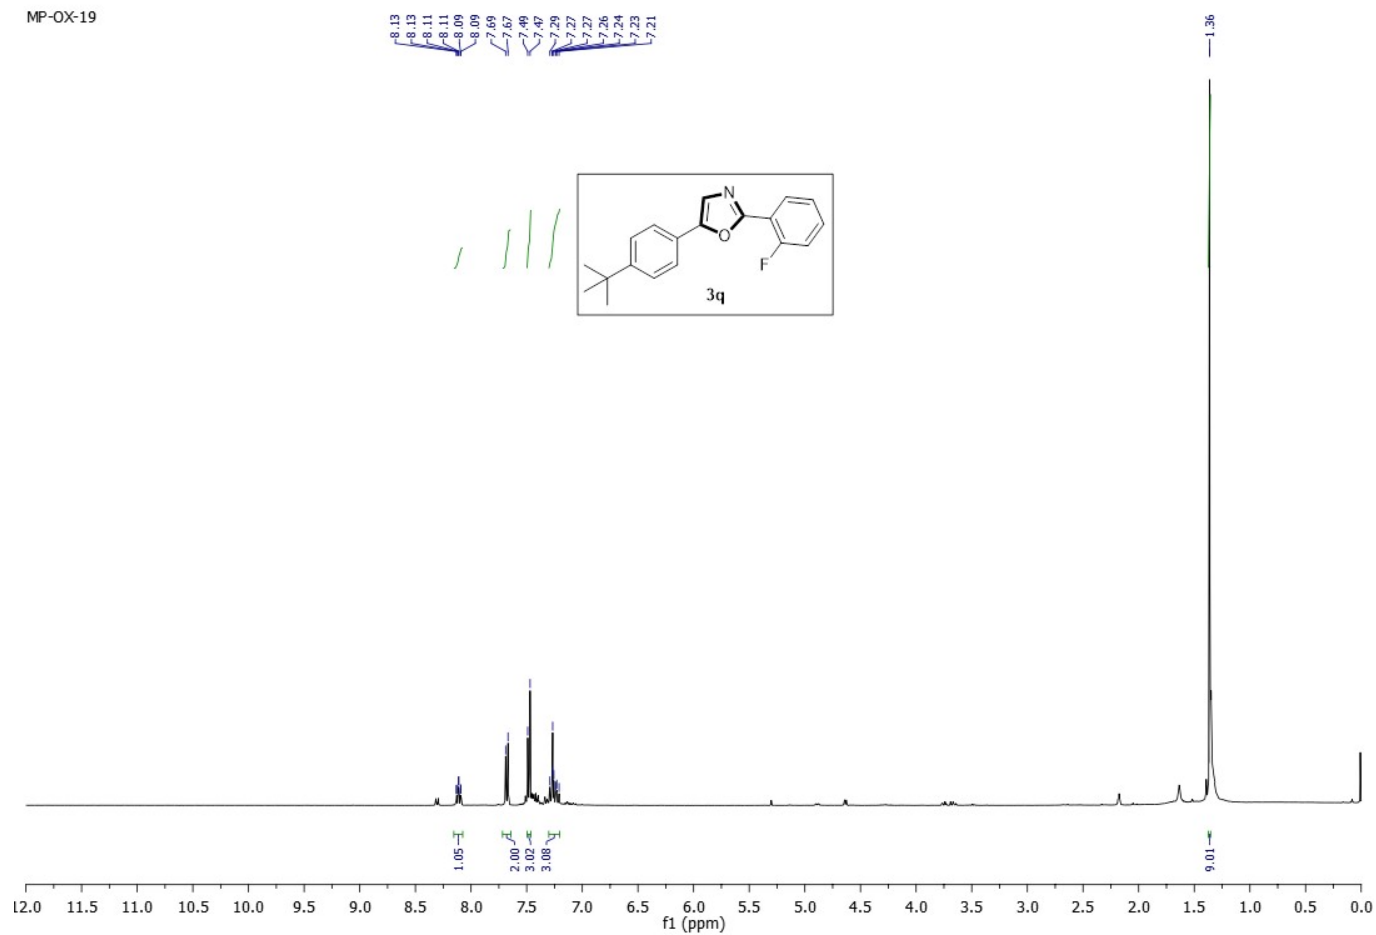

MP-OX-19 13C

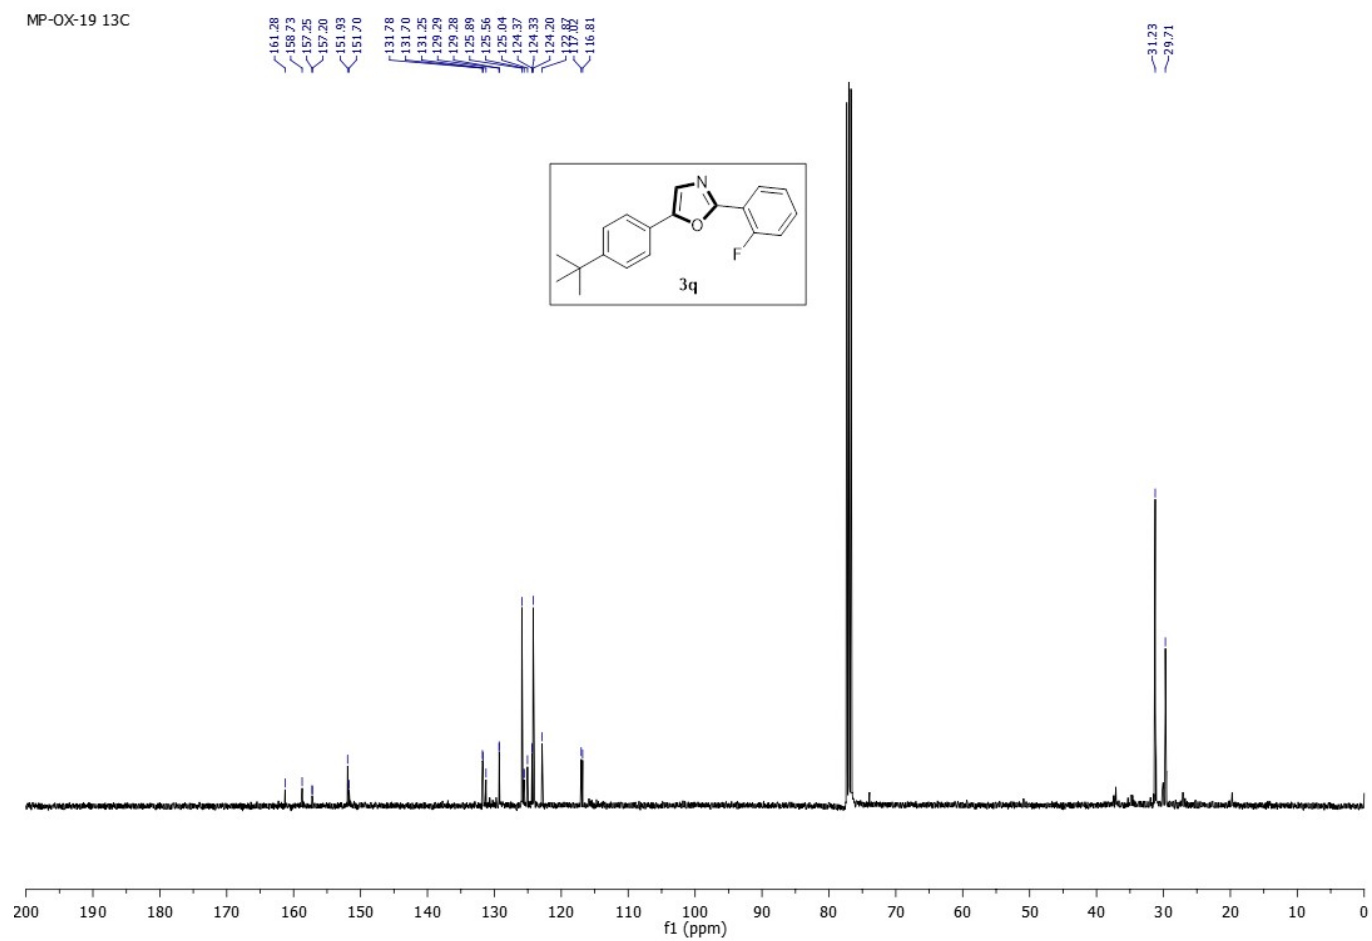

MP-OX-11

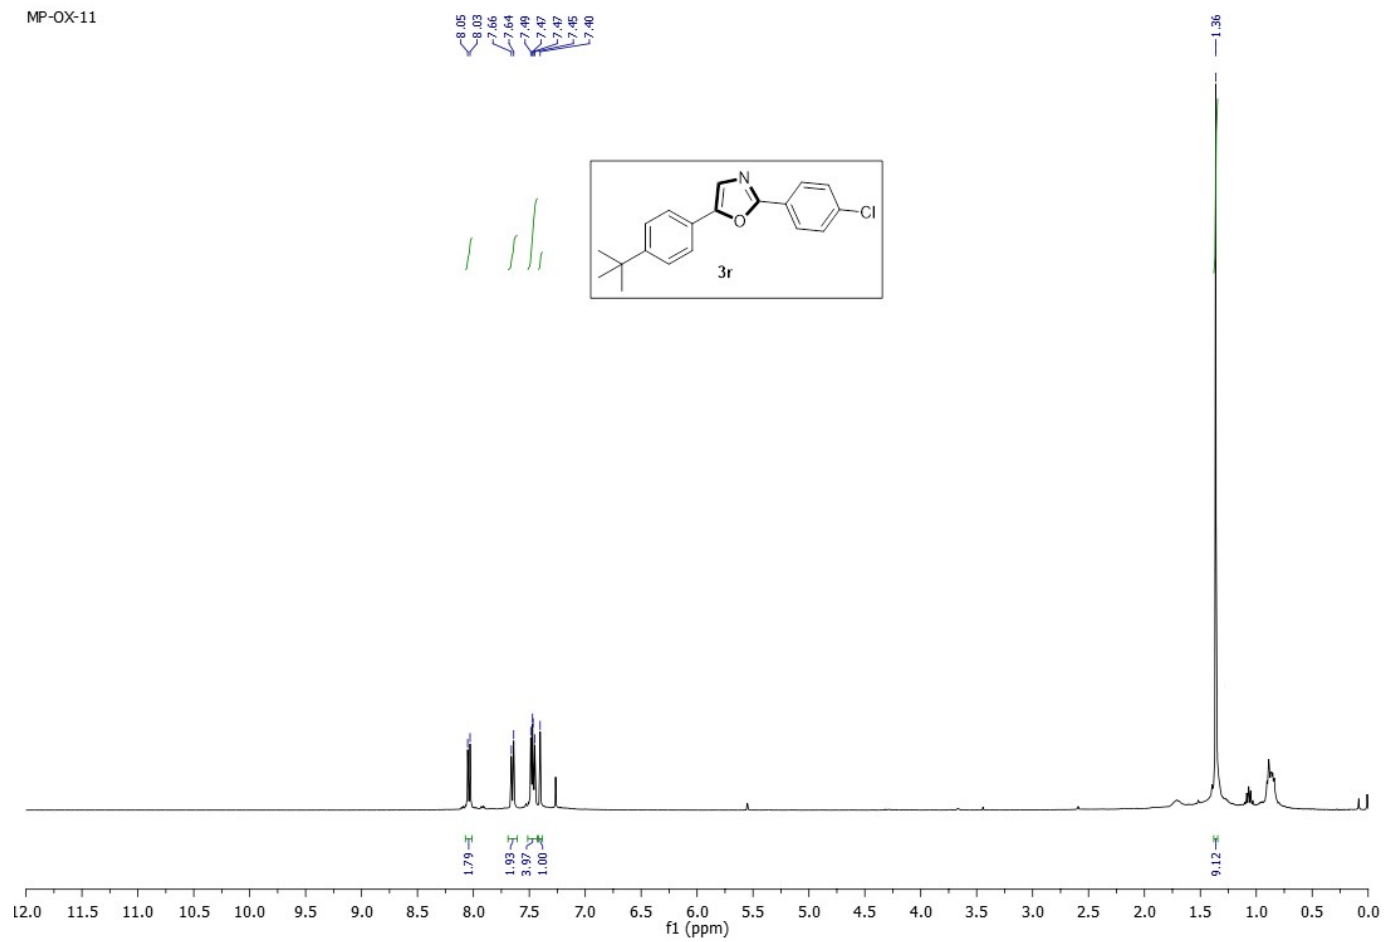

MP-OX-11 13C

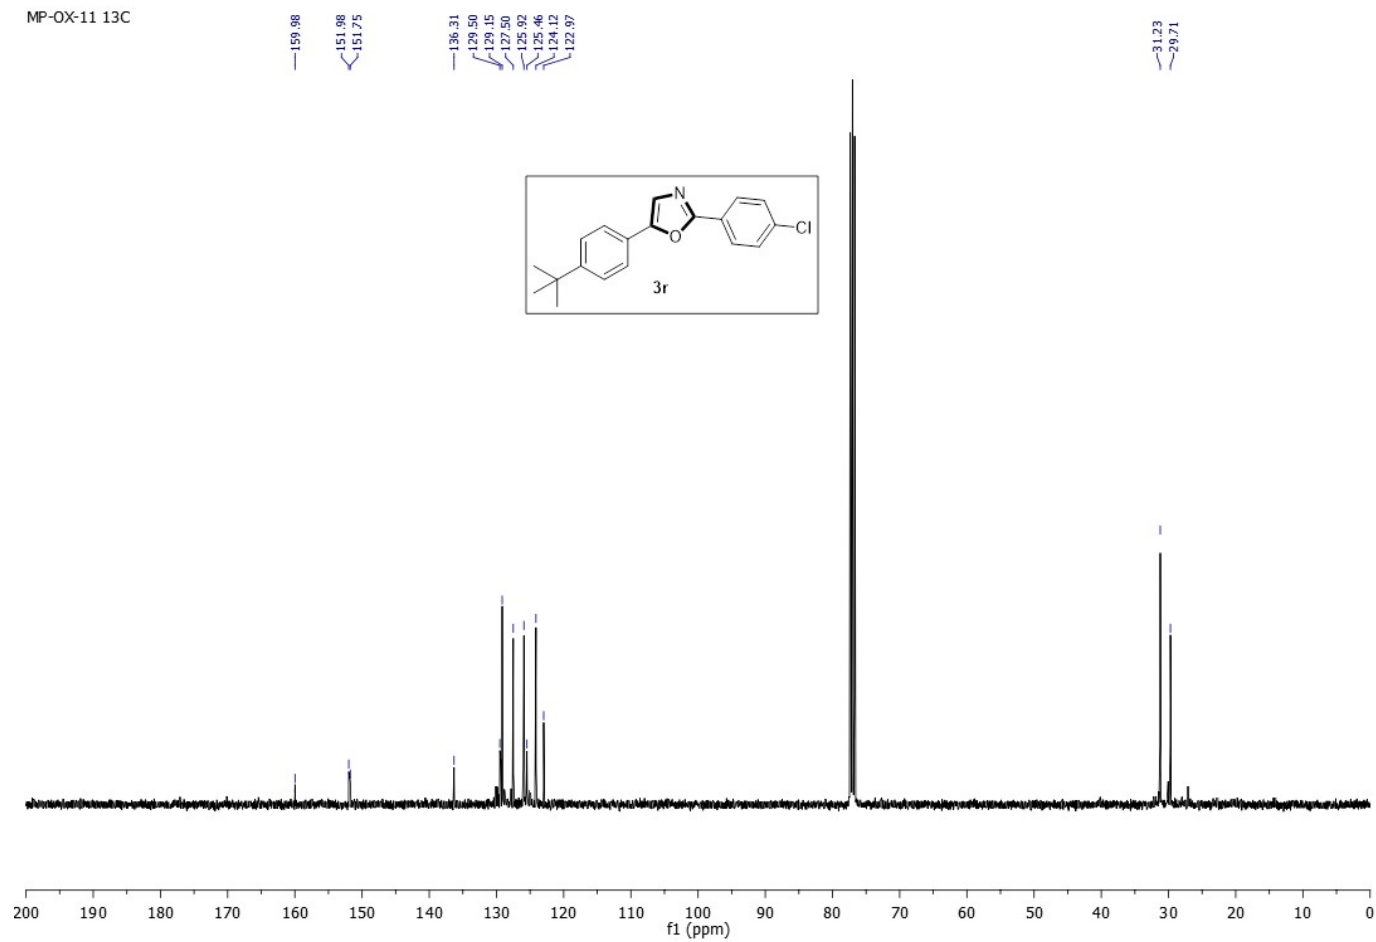

MP\_L\_01

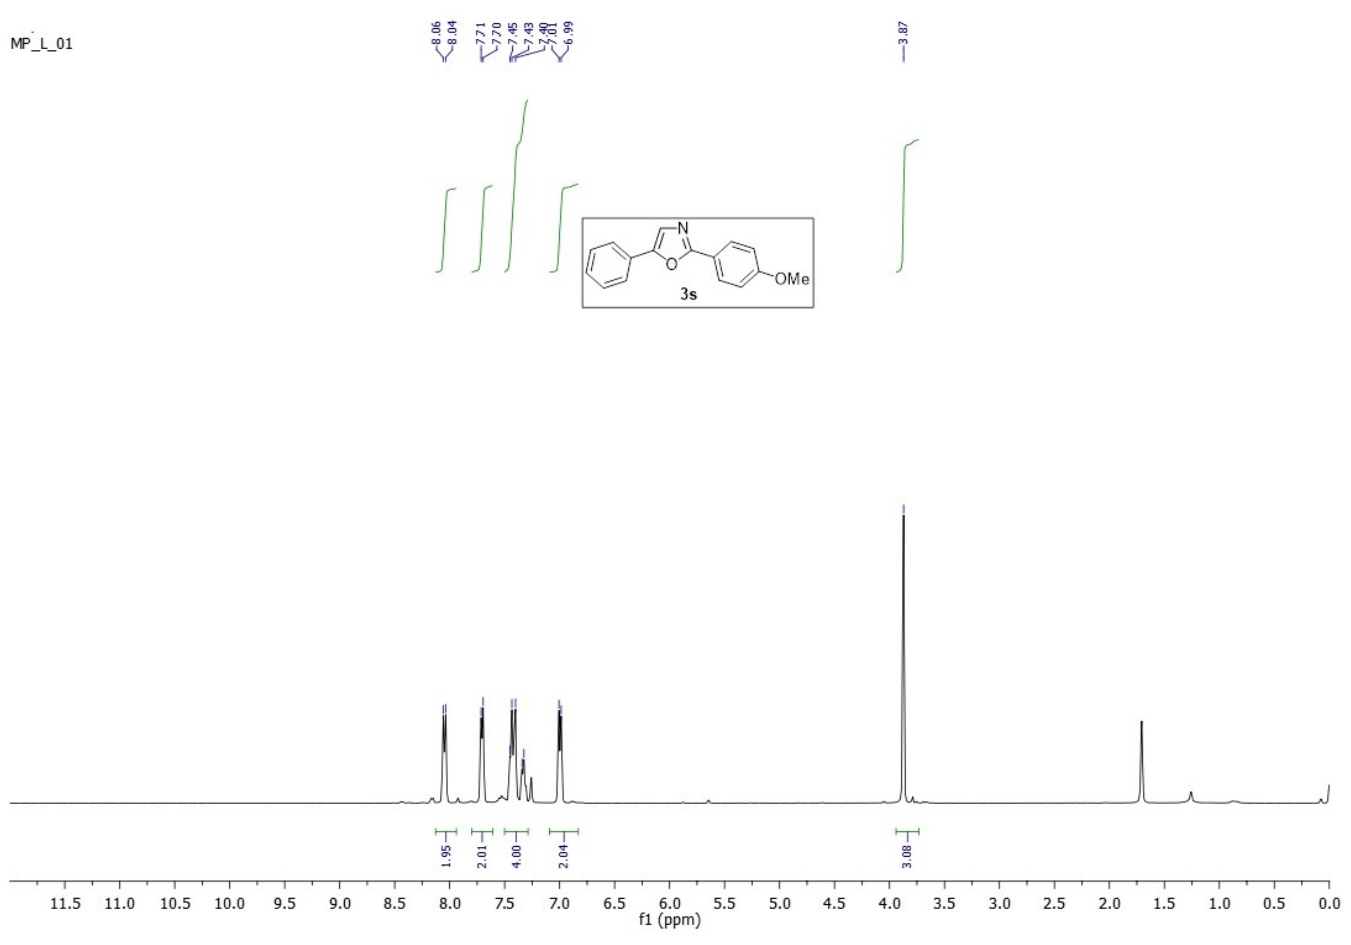

MP-L-01-13C

161.39  
161.30

150.75

128.91  
128.22  
127.98  
124.07  
123.29  
120.32

114.27

55.41

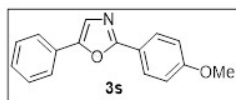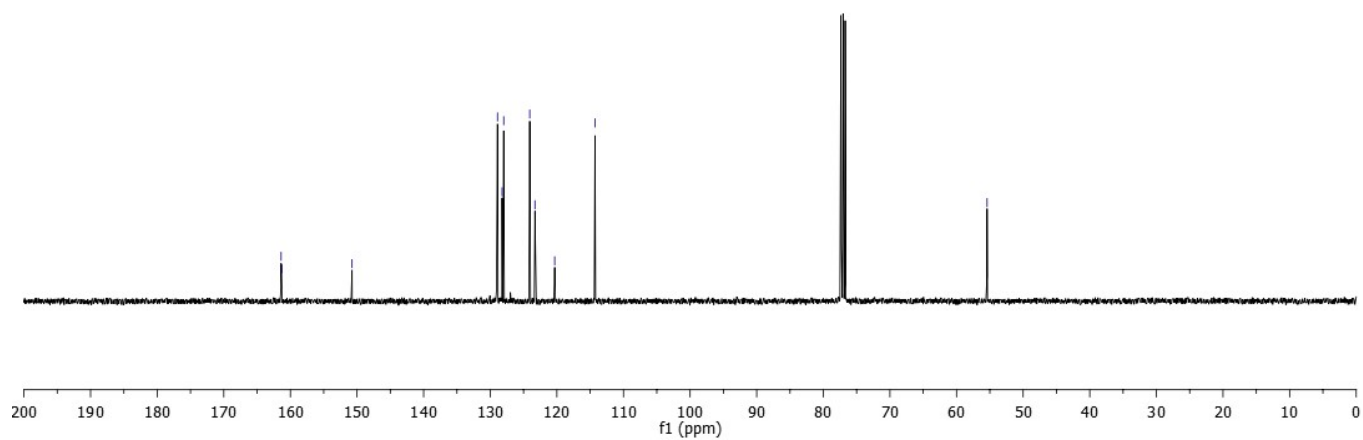

Supplement: d3ob00771e1.pdf [file d3ob00771e1.pdf]
